# Supplementary material for: Cochlear implantation for tinnitus in adults with bilateral hearing loss: protocol of a randomised controlled trial
Source: PubMed Central journal article supplement — BMJ Open. 2021 May 17;11(5):e043288. doi: 10.1136/bmjopen-2020-043288 (PMC8130732; doi:10.1136/bmjopen-2020-043288), 2021-05-17
Supplement: bmjopen-2020-043288.draft_revisions.pdf [file bmjopen-2020-043288.draft_revisions.pdf]

# BMJ Open

BMJ Open is committed to open peer review. As part of this commitment we make the peer review history of every article we publish publicly available.

When an article is published we post the peer reviewers' comments and the authors' responses online. We also post the versions of the paper that were used during peer review. These are the versions that the peer review comments apply to.

The versions of the paper that follow are the versions that were submitted during the peer review process. They are not the versions of record or the final published versions. They should not be cited or distributed as the published version of this manuscript.

BMJ Open is an open access journal and the full, final, typeset and author-corrected version of record of the manuscript is available on our site with no access controls, subscription charges or pay-per-view fees (<http://bmjopen.bmj.com>).

If you have any questions on BMJ Open's open peer review process please email [info.bmjopen@bmj.com](mailto:info.bmjopen@bmj.com)

# BMJ Open

## Tinnitus and cochlear implantation study: a randomized controlled trial

|                               |                                                                                                                                                                                                                                                                                                                                                                                                                                                                                                                                                                                                                             |
|-------------------------------|-----------------------------------------------------------------------------------------------------------------------------------------------------------------------------------------------------------------------------------------------------------------------------------------------------------------------------------------------------------------------------------------------------------------------------------------------------------------------------------------------------------------------------------------------------------------------------------------------------------------------------|
| Journal:                      | <i>BMJ Open</i>                                                                                                                                                                                                                                                                                                                                                                                                                                                                                                                                                                                                             |
| Manuscript ID                 | bmjopen-2020-043288                                                                                                                                                                                                                                                                                                                                                                                                                                                                                                                                                                                                         |
| Article Type:                 | Protocol                                                                                                                                                                                                                                                                                                                                                                                                                                                                                                                                                                                                                    |
| Date Submitted by the Author: | 03-Aug-2020                                                                                                                                                                                                                                                                                                                                                                                                                                                                                                                                                                                                                 |
| Complete List of Authors:     | Assouly, Kelly; University Medical Centre Utrecht Brain Centre, Otorhinolaryngology, Head and Neck Surgery<br>Smit, Adriana; University Medisch Centrum Utrecht, Department of Otorhinolaryngology, Head and Neck Surgery<br>Stegeman, Inge; University Medical Center Utrecht, Department of Otorhinolaryngology, Head and Neck Surgery<br>Rhebergen, Koen S. ; University Medisch Centrum Utrecht, Department of Otorhinolaryngology, Head and Neck Surgery<br>van Dijk, Bas; Cochlear Technology Center<br>Stokroos, Robert; University Medical Center Utrecht, Department of Otorhinolaryngology, Head and Neck Surgery |
| Keywords:                     | OTOLARYNGOLOGY, Audiology < OTOLARYNGOLOGY, Adult otolaryngology < OTOLARYNGOLOGY                                                                                                                                                                                                                                                                                                                                                                                                                                                                                                                                           |
|                               |                                                                                                                                                                                                                                                                                                                                                                                                                                                                                                                                                                                                                             |

SCHOLARONE™  
Manuscripts

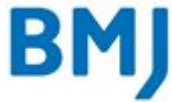

I, the Submitting Author has the right to grant and does grant on behalf of all authors of the Work (as defined in the below author licence), an exclusive licence and/or a non-exclusive licence for contributions from authors who are: i) UK Crown employees; ii) where BMJ has agreed a CC-BY licence shall apply, and/or iii) in accordance with the terms applicable for US Federal Government officers or employees acting as part of their official duties; on a worldwide, perpetual, irrevocable, royalty-free basis to BMJ Publishing Group Ltd ("BMJ") its licensees and where the relevant Journal is co-owned by BMJ to the co-owners of the Journal, to publish the Work in this journal and any other BMJ products and to exploit all rights, as set out in our [licence](#).

The Submitting Author accepts and understands that any supply made under these terms is made by BMJ to the Submitting Author unless you are acting as an employee on behalf of your employer or a postgraduate student of an affiliated institution which is paying any applicable article publishing charge ("APC") for Open Access articles. Where the Submitting Author wishes to make the Work available on an Open Access basis (and intends to pay the relevant APC), the terms of reuse of such Open Access shall be governed by a Creative Commons licence – details of these licences and which [Creative Commons](#) licence will apply to this Work are set out in our licence referred to above.

Other than as permitted in any relevant BMJ Author's Self Archiving Policies, I confirm this Work has not been accepted for publication elsewhere, is not being considered for publication elsewhere and does not duplicate material already published. I confirm all authors consent to publication of this Work and authorise the granting of this licence.

# Tinnitus and cochlear implantation study: a randomized controlled trial

**K.S. Kelly Assouly<sup>1,2,3\*</sup>, L. Adriana Smit<sup>1,2</sup>, Inge Stegeman<sup>1,2</sup>, S. Koen Rhebergen<sup>1,2</sup>, Bas van Dijk<sup>3</sup> and J. Robert Stokroos<sup>1,2</sup>**

<sup>1</sup>Department of Otorhinolaryngology and Head & Neck Surgery, University Medical Center Utrecht, the Netherlands

<sup>2</sup>Department of Clinical and Experimental Neuroscience, University Medical Center Utrecht Brain Center, Utrecht University, Utrecht, The Netherlands

<sup>3</sup>Cochlear Technology Center, Mechelen, Belgium

\*Corresponding author:

Postal address: University Medical Center Utrecht, Room number H.02.104, P.O. Box 85500,

3508 GA UTRECHT

Tel: +3188755555

E-mail: [K.K.S.Assouly@umcutrecht.nl](mailto:K.K.S.Assouly@umcutrecht.nl)

## Abstract

### Background

Tinnitus is the perception of sound without an external stimulus, often experienced as a ringing or buzzing sound. Subjective tinnitus is assumed to originate from changes in neural activity caused by reduced or lack of auditory input, for instance due to hearing loss. Since auditory deprivation is thought to be one of the causes of tinnitus, increasing the auditory input by cochlear implantation might be a possible treatment. In studies assessing cochlear implantation for patients with hearing loss, promising results were seen to relieve tinnitus as a secondary outcome. Therefore, we will assess the effect of cochlear implantation in patients with primarily tinnitus complaints.

### Method and analysis

In this randomized controlled trial, patients with a primary complaint of tinnitus will be included. Fifty patients (Tinnitus Functional Index (TFI)  $\geq 32$ , Beck's Depression Index (BDI)  $< 19$ , pure tone average at 0.5, 1, 2, 4 kHz: bilateral threshold between 50 and  $\leq 75$  dB) will be randomized towards cochlear implantation or no intervention. Primary outcome of the study is tinnitus burden as measured by the TFI. Outcomes of interest are tinnitus severity, hearing performances (tinnitus pitch and loudness, speech perception), quality of life, depression and patient related changes. Outcomes will be evaluated prior to implantation and at 3 and 6 months after the surgery. The control group will receive questionnaires at 3 and 6 months after randomization. We expect a significant difference between the cochlear implant recipients and the control group for tinnitus burden.

### Ethics and dissemination

This research protocol was approved by the Institutional Review Board of the University Medical Center (UMC) Utrecht (NL70319.041.19, V3.0, April 2020). The trial results will be made accessible to the public in a peer-review journal.

**Trial registration number** NL8693.

**Keywords:** Tinnitus, Cochlear implantation, Bilateral hearing loss, Quality of life, Electrical stimulation, Randomized Controlled Trial

## Strengths and limitations of this study

- The randomized controlled study allows for high quality assessment of outcomes of cochlear implantation for patients suffering primarily from tinnitus and secondarily from moderate to moderately severe bilateral hearing loss.
- Outcomes of interest are not limited to tinnitus burden but also consider anxiety and depression, quality of life and patient related changes.
- The intervention can induce risks associated with surgery and a residual hearing deterioration in the ear implanted which will be monitored by electrocochleography measurement.
- This study is a further step towards evidence-based medicine for the clinical efficacy of cochlear implants as a tinnitus treatment.

## Background

Tinnitus is the perception of sound without an external stimulus, often experienced as a ringing or buzzing sound [1,2]. It is a common symptom with an approximate prevalence of 10-30%, depending on the selected population [3], increasing to 30% of adults over the age of 50 years [4]. Tinnitus can be chronic and disabling for those individuals affected by it. It is a complex condition, in which many components are responsible for perceived burden, like loudness, comorbidity and sleep problems. The heterogeneous aspect of the disease is also accountable for differences in the tinnitus itself: localization, sound characteristics, temporal course and underlying cause. The burden that patients experience is diverse and the individual needs of patients for tinnitus related health care are various. While the underlying etiology of tinnitus is still debated, one hypothesis is that the tinnitus arises from changes in neural activity caused by reduced or lack of auditory input due to hearing loss which often accompanies the tinnitus [5,6]. Till date, the only evidence-based therapy for the reduction of tinnitus burden is cognitive behavioral therapy (CBT) [5,7–9].

Since auditory deprivation is thought to be one of the causes of tinnitus, increasing the auditory input by cochlear implantation might be a possible treatment option. This hypothesis is confirmed by observations in studies assessing the effectiveness of cochlear implantation to restore hearing function in case of bilateral deafness, where tinnitus reduction is one of the secondary outcomes [10]. Analyzing the effect of intracochlear electrical stimulation with a cochlear implant (CI) on primarily tinnitus complaints has been investigated by only few studies. All studies assessing the effect of cochlear implantation for tinnitus concerned cases with single-sided deafness [11–16] or patients with asymmetrical hearing loss [6]. They all reported a significant tinnitus reduction after implantation. So far, there is no high level of evidence of the effect of intracochlear stimulation as an intervention for primary tinnitus complaint in case of bilateral moderate to severe hearing loss [10].

Above mentioned studies provide the first evidence of possible effectiveness of cochlear implantation for the reduction of tinnitus burden. To provide clear evidence of the effectiveness of cochlear implantation for the suppression of tinnitus complaints, a statistically powered study is needed aiming at patients with tinnitus as their primary complaint instead of hearing loss. To what extent electrical stimulation can reduce tinnitus, in patients with bilateral moderate to severe hearing loss (just below the current CI indication) but with primary complaint of tinnitus, is unknown [17]. Therefore, we aim to study the effect of cochlear implantation on tinnitus burden in patients suffering primarily from tinnitus accompanied by bilateral moderate to severe hearing loss in a randomized controlled trial.

## Method and analysis

### Study objectives

The primary objective of this study is to assess the effect of electrical stimulation by a CI on tinnitus burden, measured with the Tinnitus Functional Index (TFI) at 6 months after cochlear implantation. Secondary outcomes are to assess the effect of CI on tinnitus severity, tinnitus pitch and loudness, auditory function, speech recognition, quality of life, symptoms of depression and anxiety, patient reported change in order to attest treatment-related differences.

### Patient involvement

Patients were not involved in the design, or conduct, or reporting, or dissemination plans of the study.

### Study design and setting

The study is a monocenter clinical trial performed in a tertiary referral clinic (university hospital) in the Netherlands (University Medical Center Utrecht). The protocol is reported according to the Standard Protocol Items: Recommendations for Interventional Trials statement [18]. In this randomized controlled trial (RCT), patients will be randomized into groups: a CI group and a control group (Fig. 1). 25 patients (CI group) shall receive a CI in the ear mostly affected by tinnitus. The other 25 patients (control group) shall follow a follow up period of 6 months with no intervention. The follow-up sessions will take place 3 and 6 months after implantation to assess the primary outcome of tinnitus burden and secondary outcomes of quality of life, treatment related outcomes and auditory function.

[Insert Figure 1]

### Study population

The study population consists of patients seeking help for tinnitus, presenting at the outpatient clinic of Ear, Nose and Throat (ENT) of the UMC Utrecht, The Netherlands. 50 patients aged 18 or older with moderate to severe tinnitus and moderate to severe hearing loss will be included after fulfilling eligibility and informed consent. They must meet the following criteria to be eligible for the study at randomization.

### Inclusion criteria

- Patients aged 18 or older



- Seeking help for tinnitus
- Subjective tinnitus
- Tinnitus Functional Index (TFI) > 32
- Tinnitus duration > 1 and tinnitus stability > 6 months
- Hearing level (measured with a maximum of 3 months before eligibility assessment):
  - Audiometry (Pure Tone Average (PTA) at 0.5,1,2,4 kHz): bilateral threshold between 50 and  $\leq 75$  dB
  - Hearing threshold stability (PTA < 5 dB change for 1 year in each ear)
- Becks Depression Inventory (BDI) <19
- Health status allows general anesthesia and surgery for the cochlear implantation
- Failure of regular tinnitus care (e.g. psychological or sound therapy)
- Dutch language proficiency
- Willingness and ability to participate in all scheduled procedures outlined in the protocol
- Able to understand and sign informed consent

### Exclusion criteria

A potential patient who meets any of the following criteria will be excluded from participation in this study:

- Patient primary seeking help for non-tinnitus hearing problems
- Abnormal cochlear anatomy (i.e. ossification)
- Comorbidity with an expected survival of less than five years based on medical history as assessed by clinician and in electronic patient file
- Additional handicaps that would prevent participation in the evaluations
- Presence of any unstable psychiatric condition within 1 year before start of the study
- Unrealistic expectations on the part of the patient regarding the possible benefits, risks and limitations that are inherent to the procedure

If a patient is eligible for the study, his/her otorhinolaryngologist will ask him/her to participate. The content of the study will be explained by the patient's otorhinolaryngologist who will provide him/her written patient information and the informed consent form. Patients will be given 2 weeks to consider participation. If a patient meets the criteria for in- and exclusion and wants to take part in the study, the patient will be asked to come to the UMC Utrecht for a computerized tomography (CT) scan to visualize the anatomy of the mastoid. If the patient's CT scan shows normal cochlear anatomy, he will, during the same visit, sign the informed consent with a member of the research

1  
2  
3 team and receive a copy of the consent. After inclusion, baseline measurement will be performed  
4 where after randomization will take place.  
5  
6

## 8 **Randomization**

9  
10 After inclusion and baseline measurement, patients will be allocated into one of the two groups:  
11 CI group or control group. The randomization will be performed using a block size of 4 and 6 and  
12 stratified for TFI score. A website randomization program, developed by the Julius Centre [19] will  
13 be used for randomization. Investigators will be blinded to the randomization. Blinding is not  
14 possible during this study since both patients and caregivers will be able to see from outside  
15 whether patients have a CI or not.  
16  
17  
18  
19  
20

## 21 **Intervention**

22  
23 Patients allocated to the intervention group will receive a CI. The cochlear implantation will be  
24 carried out under general anesthesia after consent of the anesthesiologist and after determination  
25 of general health status. The standard surgical procedures for cochlear implantation will be  
26 followed. A retro-auricular incision will be made to expose the mastoid. The electrode will be  
27 inserted via a posterior tympanotomy and round window implantation by soft-surgery techniques.  
28 Intraoperatively, normal functioning of the device will be checked by measurement of impedance  
29 and neural response telemetry. Electrocochleography will also be recorded intraoperatively using  
30 Cochlear™ Research Platform (v1.1). The cochlear implant used for the study consists of a  
31 Nucleus 7 sound processor and a CI622 implant from Cochlear (or similar). Serial numbers of the  
32 CIs will be registered in the operating room (OR) report by the surgeon (standard clinical care for  
33 cochlear implantation) and in the master study file (MSF) (product accountability). A post-operative  
34 Cone Beam CT of the mastoid will be planned to detail the electrode location within the cochlea.  
35  
36  
37  
38  
39  
40  
41

42 One week after surgery patients from the intervention group will be checked at the  
43 outpatient department (OPD) of the ENT to check for wound healing. The rehabilitation phase will  
44 start 4 weeks after surgery with a visit of the patient to the department of Audiology to custom fit  
45 the processor software and then (bi)weekly till week eleven after surgery to fine-tune the  
46 programming of the implant and improve speech perception.  
47  
48

49 In the follow-up phase, the patients with CI will return to the UMC Utrecht 3 and 6 months after  
50 implantation to assess study outcome by the research team. The patients of the control group will  
51 come to the UMC Utrecht 3 and 6 months after randomization to assess the same study outcome.  
52 A questionnaire will have to be filled in at home by the patients before every follow-up session at  
53 3 and 6 months, as well as 2 weeks after surgery for the intervention group.  
54  
55  
56  
57  
58  
59  
60

Participants are not allowed to start another tinnitus treatment during the study.

## Sample size

To detect a clinically relevant difference of 1 grade (15 points) change measured with the TFI, in tinnitus burden at 6 months after cochlear implantation compared to the control group, with a power of 90% and alpha of 0.05, 23 patients are needed in both arms of the study. An acceptable standard deviation was set at 15, based on the results of a previous pilot study assessing CI for tinnitus patients [16]. We will include 25 patients per arm, a 10% margin, to include for possible lost to follow up. Thereby, we expect patients to have a mean TFI at baseline of 50 points on TFI (Grade 3) and a TFI decrease of 15 points at 6 months after intervention with a mean endpoint of 35 points on TFI (Grade 2).

## Outcomes

The following outcomes will be assessed at the baseline visit and follow up visits at 3 and 6 months after randomization (Table 1). All measurements will be performed by the research team following the same protocol procedures.

|                         | Baseline | CI GROUP |             |             |             | CONTROL GROUP |          |
|-------------------------|----------|----------|-------------|-------------|-------------|---------------|----------|
|                         | Rx       | CI       | 2 w post CI | 3 m post CI | 6 m post CI | Rx + 3 m      | Rx + 6 m |
| CI (surgery)            |          | X        |             |             |             |               |          |
| CT scan                 | x        | X        |             |             |             |               |          |
| Electro-cochleography   | x        | X        |             | X           | X           |               |          |
| Hearing level           |          |          |             | X           | X           | X             | X        |
| Speech perception       | x        |          |             | X           | X           | X             | X        |
| Tinnitus pitch match    | x        |          |             | X           | X           | X             | X        |
| Tinnitus loudness match | x        |          |             | X           | X           | X             | X        |
| TFI*                    | x        |          |             | X           | X           | X             | X        |
| VAS Tinnitus *          | x        |          | X           | X           | X           | X             | X        |

|       |   |  |  |   |   |   |   |
|-------|---|--|--|---|---|---|---|
| SSQ*  | x |  |  | X | X | X | X |
| EQ5D* | x |  |  | X | X | X | X |
| HADS* | x |  |  | X | X | X | X |
| BDI*  |   |  |  |   | X |   | X |
| GBI*  |   |  |  |   | X |   |   |
| CGI*  |   |  |  | X | X |   |   |

**Table 1.** Schedule of visits and assessments to measure study outcome per group.

CI: cochlear implantation; e.o.s: end of study; Rx: randomization; \* questionnaires (Q) will be filled in at home;

### Primary outcome measure

Our primary outcome is tinnitus burden as measured with the validated Tinnitus Functional Index (TFI). The Tinnitus Functional Index (TFI) is a 25 items containing questionnaire with statements/questions about tinnitus burden [20,21]. The index is divided in 8 subscale items: intrusive, sense of control, cognitive, sleep, auditory, relaxation and quality of life. Possible answers are ranging between 0 and 10, resulting in a maximum score of 100, representing a maximum burden of tinnitus. This total score is then categorized into five different grades, indicating low to high burden.

### Secondary outcome measures

#### Audiological tests

Five audiological measurements are included in the study and are performed by an audiologist according to the ISO 16832:2006 [22].

#### Pure tone audiometry

The first evaluation is a pure tone audiometry (PTA) at 0.25, 0.5, 1, 1.5, 2, 4 kHz. This standard measurement evaluates the audible threshold of the patient by having patients indicating audibility for frequency specific pure tone stimuli at different loudness level. The evaluation results in an audiogram which provides information about the hearing level of the patients.

#### Speech recognition test in quiet and noise

1  
2  
3 The second evaluation is a speech recognition test in quiet and noise. For the patients receiving  
4 a cochlear implant, post-intervention assessments will be applied with the CI. The participant is  
5 listening at digits, phonic words and Dutch words in a sound-treated booth. The loudness of the  
6 speech will change during the test in steps of 2 dBs, but the noise signal will be presented at a  
7 constant level of 65dB SPL. The patient is asked to repeat back the words. The patient will perform  
8 the same test in two different conditions: with or without noise. The speech in noise test will be  
9 stopped if the patient is unable to understand speech at a signal-to-noise ratio (SNR) > 20 dB.  
10 This test results in a Speech Reception Threshold (SRT) obtained by averaging the signal-to-  
11 noise ratio over the list of words presented in order to obtain a 50% correct score. The outcome  
12 will permit to set up a rehabilitation program with a speech therapist for the intervention group.  
13  
14  
15  
16  
17  
18  
19

### 20 Electrocochleography

21 Electrocochleography (ECoChG) is a technique to record electrical potentials generated in the  
22 inner ear and auditory nerve in response to acoustic stimulation. ECoChG measurement will be  
23 performed intra-operatively and at 3 and 6 months after cochlear implantation. The measure will  
24 be followed by conventional audiological examination. During the measurement postoperatively,  
25 the patient will be asked to sit comfortably on a chair and not move. The operator will install the  
26 earplug in the patient's ear and connect it to an audio cable attached to a sound processor. The  
27 sound processor will generate acoustic stimulation through the audio cable and the electrical  
28 responses will be recorded in real time via the Cochlear™ Research Platform (v1.1, Cochlear Ltd).  
29 The ECoChG provides a measure of the cochlear function.  
30  
31  
32  
33  
34  
35  
36  
37

### 38 Pitch match experiment

39 Pitch match of tinnitus is performed to find the pitch corresponding to the tinnitus pitch of the  
40 patient. An acoustic pitch matching and an electric pitch matching will be performed in a sound-  
41 treated booth. The acoustic pitch matching will provide information about the frequency of the  
42 tinnitus perceived whereas the electric pitch matching will provide information about the pitch  
43 matched electrode. They are obtained using a two-Alternative Forced-Choice (2AFC) method and  
44 a 1 up 2 down adaptive staircase rule [23]. The patient will be asked to concentrate on the  
45 predominant pitch of their tinnitus. Two tones will be presented at the same intensity level  
46 previously matched with tinnitus. The patient will indicate which option, the first or the second,  
47 sounds the closest in pitch by manipulating the response switch forward and backward. The  
48 difference between the first and the second will become smaller and smaller, until there is one  
49 frequency that matches best. Each stimulation will be performed twice (apical-to-basal and basal-  
50  
51  
52  
53  
54  
55  
56  
57  
58  
59  
60

1  
2  
3 to-apical to prevent octave-confusion). The pitch matched will be identified as the pitch resulting  
4 of the two runs. If the result of the two runs is not the same, the procedure will be repeated until  
5 finding a consistent result at least two times [24].  
6  
7

### 8 9 Loudness match experiment

10 Loudness match of tinnitus is performed to find the loudness corresponding to the tinnitus  
11 acoustically and electrically [25]. The experiment uses different pure tones at 0.5, 1, 2, 3 and 4  
12 kHz and a 2AFC method. The pure tones are initially presented at 6 dB above threshold. The  
13 patient is instructed to adjust the loudness of the comparison tones to match that of their tinnitus.  
14 The adjustment of the intensity is made in a range of 5dB for rough determination and then 1 dB  
15 steps until a satisfactory loudness match is obtained.  
16  
17  
18  
19  
20  
21

### 22 CI usage

23 The history of several user characteristics will be logged from the processor. This provides the  
24 following outcome parameters:  
25

- 26     ▪ Time on air, providing the time the device was used in speech environment or the  
27         device was off
- 28     ▪ Scenes, providing the time spending in different environments: quiet, speech,  
29         noise, speech in noise, music and wind
- 30     ▪ Level of the environmental sound in dBA
- 31     ▪ Program usage, providing a daily average on program usage  
32  
33  
34  
35  
36  
37

### 38 Questionnaires

39 Questionnaires will be sent by e-mail to the study participants through the data management  
40 program Castor EDC [26]. If participants do not want to perform online questionnaires, they will  
41 receive paper versions of the questionnaires by postal services. All questionnaires will be in the  
42 Dutch language.  
43  
44  
45  
46  
47

### 48 Tinnitus questionnaire

- 49     • The Visual Analogue Scale (VAS) *Tinnitus* has 2 items. The patient answers two questions  
50         about tinnitus severity and intrusiveness using a visual analogue scale that ranges from 0  
51         (not at all) to 10 (extremely).  
52  
53  
54

### 55 Patient reported benefits

- The *Clinical Global Impression (CGI)* consists of a 1-item observer-rated scale that measures global improvement or change (CGIC) [27]. The question is scored on a scale from 1 to 7, 1 meaning “Very much improved” to 7 meaning “Very much worse”.
- The *Glasgow Benefit Inventory (GBI)* is a validated questionnaire reporting change in health-related quality of life post-intervention [28]. It consists of 18 questions scored on a 5-points Likert scale where 1 indicates “much worse” and 5 is for “much better”. The questionnaire presents three different items: general subscale, social support and physical health.

### Quality-of-life (QoL) questionnaires

- The *EQ5D* is a standardized measure of generic health status. It contains only 5 questions. Each question deals with a specific domain: mobility, self-care, usual activities, pain/discomfort and anxiety/depression [29]. The patient must choose between different sentences which corresponds to his/her health condition. The last question is a self-report of the overall health status using a visual analogue scaling from 0 (the worst health you can imagine) to 100 (the best health you can imagine).
- The *Speech, Spatial and Qualities Hearing Scale (SSQ)* measures hearing related quality of life and consists of three scales that assess different domains of hearing: 1) the speech hearing subscale consists of 15 questions that assess the ability to separate speech from competing noise in a wide range of listening contexts, 2) the spatial hearing subscale consists of 17 questions that assess the ability to locate sound sources and their direction of movement, 3) the quality of hearing subscale consists of 19 questions that assess naturalness and clarity of sound sources [30]. Possible answers are scored using a visual analogue scale ranging from 0 (not at all) to 10 (excellent).

### Comorbid symptom scores

- The *Beck Depression Inventory (BDI)* is a twenty-one items questionnaire used as an indicator of the severity of depression [31]. Each question is scored on four points ranged between 0 (for example ‘I do not feel sad’) and 3 (‘I am so sad’) with a maximum of total score of 63.
- The *Hospital Anxiety and Depression Scale (HADS)* is a fourteen-item screening tool for anxiety and depression symptoms in non-psychiatric clinical populations [32,33]. Each

1  
2  
3 sentence is scored between 0 and 3 where 0 confirms the sentence and 3 disagrees with  
4 it.  
5  
6  
7

## 8 **Statistical analysis**

9  
10 Baseline characteristics per group will be described as means or medians, depending on the  
11 normality of the data, and standard deviations. Between-group mean differences will be calculated  
12 with 95% confidence intervals. A p-value <0.05 is considered statistically significant.  
13  
14

15 The primary outcome will be the difference in TFI score between the intervention at 6 months after  
16 cochlear implantation and the control group after six months of no intervention, a continuous  
17 variable. Differences between the control and intervention group will be calculated using the  
18 unpaired t-test and the Mann-Whitney u test. The secondary outcome measures will be the  
19 performances on the auditory tests and the questionnaires. Differences between groups will be  
20 calculated using the unpaired t-test and the Mann-Whitney u test. Within-subject comparisons will  
21 entail differences of mean values. These will be analyzed using paired t-tests for continuous  
22 measures.  
23  
24  
25  
26  
27

28 Interim analyses on the safety data will be performed and reviewed by a data safety  
29 monitoring board (DSMB). An interim analysis will be done every three months starting after the 5  
30 first patients reached 3 months of follow-up. A statistician will perform non-parametric test on the  
31 pure tone average (PTA) at 0.25, 0.5, 1, 1.5 kHz without CI and speech perception unaided and  
32 aided to monitor the residual hearing preservation. The DSMB will advise on stopping the study if  
33 there is a risk for the patient's safety based on tinnitus worsening and deterioration of hearing.  
34  
35  
36  
37

38 Potential missing data will be handled using multiple imputation. Complete cases analyses will  
39 be done as a sensitivity analysis. All analyses will be performed on an intention-to-treat basis.  
40  
41  
42  
43

## 44 **Ethics and dissemination**

45 The study will be conducted according to the principles of the Declaration of Helsinki (version  
46 2013, Fortaleza) and in accordance with the Medical Research Involving Human Subjects Act  
47 (WMO). The research protocol was approved by the Institutional Review Board (IRB) of the UMC  
48 Utrecht (NL70319.041.19) and the Dutch competent authorities.  
49  
50  
51

52 All amendments will be notified to the local Medical Research Ethics Committee (MREC). The  
53 data from this study will be used for publication in peer-reviewed international journals, preferably  
54  
55  
56  
57  
58  
59  
60



1  
2  
3 open-access. To diminish possible chance on publication bias, the study will be reported using  
4 the CONSORT guidelines [34].  
5

6 All data will be treated confidentially. The data will be encrypted by using an unique patient  
7 identification number. The analysis will be performed with these coded patient data. The key code  
8 will be safeguarded by the investigators. The paper data files and informed consents will be stored  
9 in a locked cabin in a locked room. The data will be stored on the investigator's computer as well,  
10 which is secured by a password and situated in a locked room. The handling of personal data will  
11 comply with the EU General Data Protection Regulation and the Dutch Act on Implementation of  
12 the General Data Protection Regulation, the Uitvoeringswet AVG, UAVG. The final trial data set  
13 will be safeguarded and available to the principal investigator and approved members of the  
14 research team.  
15

16 The investigator will submit a summary of the progress of the trial to the accredited MREC once  
17 a year. Information will be provided on the date of inclusion of the first subject, numbers of subjects  
18 included and numbers of subjects that have completed the trial, serious adverse events/serious  
19 adverse reactions, other problems, and amendments.  
20

21 All cases of serious adverse events will be reported to the local IRB and the Dutch  
22 competent authorities. Trial quality will be monitored independently by the Julius Clinical Centre  
23 (UMC Utrecht, the Netherlands) according to regulations by the UMC Utrecht and the Dutch  
24 government. The local monitor will check 50% of signed ICs, inclusion and exclusion criteria,  
25 source data and serious adverse events (SAE).  
26

## 27 **Trial status**

28 The study is currently in recruitment phase.  
29  
30  
31  
32  
33  
34  
35  
36  
37

## 38 **Abbreviations**

|            |                                           |
|------------|-------------------------------------------|
| 39 BDI     | Beck Depression Inventory                 |
| 40 CBT     | Cognitive Behavioral Therapy              |
| 41 CI      | Cochlear Implant                          |
| 42 CGI     | Client Global Impression                  |
| 43 CONSORT | Consolidated Standard of Reporting Trials |

44  
45  
46  
47  
48  
49  
50  
51  
52  
53  
54  
55  
56  
57  
58  
59  
60

|    |        |                                             |
|----|--------|---------------------------------------------|
| 1  |        |                                             |
| 2  |        |                                             |
| 3  | CT     | Computerized Tomography                     |
| 4  |        |                                             |
| 5  | DTT    | Digit Triplet Test                          |
| 6  |        |                                             |
| 7  | ECochG | Electrocochleography                        |
| 8  |        |                                             |
| 9  | ENT    | Ear, Nose and Throat                        |
| 10 |        |                                             |
| 11 | EQ5D   | Euro-QoL 5D                                 |
| 12 |        |                                             |
| 13 |        |                                             |
| 14 | EU     | European Union                              |
| 15 |        |                                             |
| 16 | GBI    | Glasgow Benefit Inventory                   |
| 17 |        |                                             |
| 18 | HADS   | Hospital Anxiety and Depression Scale       |
| 19 |        |                                             |
| 20 |        |                                             |
| 21 | IC     | Informed Consent                            |
| 22 |        |                                             |
| 23 | IRB    | Institutional Review Board                  |
| 24 |        |                                             |
| 25 | MREC   | Medical Review Ethics Committee             |
| 26 |        |                                             |
| 27 | MSF    | Master Study File                           |
| 28 |        |                                             |
| 29 |        |                                             |
| 30 | OPD    | Outpatient department                       |
| 31 |        |                                             |
| 32 | OR     | Operating room                              |
| 33 |        |                                             |
| 34 | PTA    | Pure Tone Average                           |
| 35 |        |                                             |
| 36 | QoL    | Quality-of-life                             |
| 37 |        |                                             |
| 38 |        |                                             |
| 39 | RCT    | Randomized controlled trial                 |
| 40 |        |                                             |
| 41 | SAE    | Serious Adverse Event                       |
| 42 |        |                                             |
| 43 | SNR    | Signal-to-Noise Ratio                       |
| 44 |        |                                             |
| 45 | SRT    | Speech Reception Threshold                  |
| 46 |        |                                             |
| 47 |        |                                             |
| 48 | SSD    | Single Sided Deafness                       |
| 49 |        |                                             |
| 50 | SSQ    | Speech, Spatial and Qualities Hearing Scale |
| 51 |        |                                             |
| 52 | TFI    | Tinnitus Functional Index                   |
| 53 |        |                                             |
| 54 |        |                                             |
| 55 | UMCU   | University Medical Center                   |
| 56 |        |                                             |
| 57 |        |                                             |
| 58 |        |                                             |
| 59 |        |                                             |
| 60 |        |                                             |

|    |      |                                               |
|----|------|-----------------------------------------------|
| 1  |      |                                               |
| 2  |      |                                               |
| 3  | VAS  | Visual analogue scale                         |
| 4  |      |                                               |
| 5  | WMO  | Medical Research Involving Human Subjects Act |
| 6  |      |                                               |
| 7  | 2AFC | Two-Alternative Forced-Choice                 |
| 8  |      |                                               |
| 9  |      |                                               |
| 10 |      |                                               |
| 11 |      |                                               |
| 12 |      |                                               |
| 13 |      |                                               |
| 14 |      |                                               |
| 15 |      |                                               |
| 16 |      |                                               |
| 17 |      |                                               |
| 18 |      |                                               |
| 19 |      |                                               |
| 20 |      |                                               |
| 21 |      |                                               |
| 22 |      |                                               |
| 23 |      |                                               |
| 24 |      |                                               |
| 25 |      |                                               |
| 26 |      |                                               |
| 27 |      |                                               |
| 28 |      |                                               |
| 29 |      |                                               |
| 30 |      |                                               |
| 31 |      |                                               |
| 32 |      |                                               |
| 33 |      |                                               |
| 34 |      |                                               |
| 35 |      |                                               |
| 36 |      |                                               |
| 37 |      |                                               |
| 38 |      |                                               |
| 39 |      |                                               |
| 40 |      |                                               |
| 41 |      |                                               |
| 42 |      |                                               |
| 43 |      |                                               |
| 44 |      |                                               |
| 45 |      |                                               |
| 46 |      |                                               |
| 47 |      |                                               |
| 48 |      |                                               |
| 49 |      |                                               |
| 50 |      |                                               |
| 51 |      |                                               |
| 52 |      |                                               |
| 53 |      |                                               |
| 54 |      |                                               |
| 55 |      |                                               |
| 56 |      |                                               |
| 57 |      |                                               |
| 58 |      |                                               |
| 59 |      |                                               |
| 60 |      |                                               |

## Authors' contributors

All authors (KKSA, ALS, IS, KSR, RJS and BvD) developed the protocol. IS provided statistical expertise in clinical trial design. KKSA drafted the manuscript. All other authors revised the manuscript. All authors read and approved the final version.

## Funding

Part of cost involved of this study is funded by Cochlear Ltd. as a non-restrictive research grant. Cochlear Ltd. did not and will – by a research contract – not have influence on the data collection, analysis, data interpretation and publication.

## Competing interests

KKSA received funding from the European Union's Horizon 2020 research and innovation program under the Marie Skłodowska-Curie grant (agreement number 764604). KSSA and BvD are employed at Cochlear Technology Centre, Mechelen, Belgium. No further conflict of interest is reported by the authors.

## Ethical approval

This research protocol was approved by the Institutional Review Board (IRB) of the UMC Utrecht (NL70319.041.19, V4, April 2020).

**Word count:** 3903 words

## Figure legends

**Figure 1:** Study flowchart.

CI: cochlear implant group; Control: control group

## References

1. van den Berge MJC, Free RH, Arnold R, de Kleine E, Hofman R, van Dijk JMC, et al. Cluster analysis to identify possible subgroups in tinnitus patients. *Front Neurol*. 2017;8(APR):1–7.
2. Moller AR, Salvi R, De Ridder D, Kleinjung T, Vanneste S. Pathology of Tinnitus and Hyperacusis-Clinical Implications. *Biomed Res Int* [Internet]. 2015;2015:608437. Available from: <https://doi.org/10.1155/2015/608437>
3. Møller AR. Epidemiology of Tinnitus in Adults BT - Textbook of Tinnitus. In: Møller AR, Langguth B, De Ridder D, Kleinjung T, editors. New York, NY: Springer New York; 2011. p. 29–37. Available from: [https://doi.org/10.1007/978-1-60761-145-5\\_5](https://doi.org/10.1007/978-1-60761-145-5_5)
4. Davis AE. The epidemiology of tinnitus. *Handb Tinnitus* (R Tyler,ed). 2000;Singluar:1–23.
5. Hoare DJ, Kowalkowski VL, Kang S, Hall DA. Systematic review and meta-analyses of randomized controlled trials examining tinnitus management. *Laryngoscope*. 2011 Jul;121(7):1555–64.
6. Mertens G, De Bodt M, Van de Heyning P. Cochlear implantation as a long-term treatment for ipsilateral incapacitating tinnitus in subjects with unilateral hearing loss up to 10 years. *Hear Res* [Internet]. 2016;331:1–6. Available from: <http://dx.doi.org/10.1016/j.heares.2015.09.016>
7. Dobie RA. A Review of Randomized Clinical Trials in Tinnitus. *Laryngoscope* [Internet]. 1999 Aug 1;109(8):1202–11. Available from: <https://doi.org/10.1097/00005537-199908000-00004>
8. Hoare DJ, Edmondson-Jones M, Sereda M, Akeroyd MA, Hall D. Amplification with hearing aids for patients with tinnitus and co-existing hearing loss. *Cochrane Database of Systematic Reviews*. 2014.
9. Martinez-Devesa P, Perera R, Theodoulou M, Waddell A. Cognitive behavioural therapy for tinnitus. *Cochrane Database Syst Rev*. 2010;
10. Ramakers GGJ, Van Zon A, Stegeman I, Grolman W. The effect of cochlear implantation on tinnitus in patients with bilateral hearing loss: A systematic review. *Laryngoscope*. 2015;125(11):2584–92.
11. Ramos Macías A, Falcón-González JC, Manrique Rodríguez M, Morera Pérez C, García-Ibáñez L, Cenjor Español C, et al. One-Year Results for Patients with Unilateral Hearing Loss and Accompanying Severe Tinnitus and Hyperacusis Treated with a Cochlear Implant. *Audiol Neurotol*. 2018;23(1):8–19.
12. Van De Heyning P, Vermeire K, Diebl M, Nopp P, Anderson I, De Ridder D. Incapacitating

- 1  
2  
3 unilateral tinnitus in single-sided deafness treated by cochlear implantation. *Ann Otol*  
4 *Rhinol Laryngol.* 2008;117(9):645–52.  
5  
6 13. Poncet-Wallet ÃC, Mamelle ÃE, Godey B, Truy E, Guevara N, Ardoint M, et al.  
7 Prospective Multicentric Follow-up Study of Cochlear Implantation in Adults With Single-  
8 Sided Deafness : Tinnitus and Audiological Outcomes. 2019;0.  
9  
10 14. Kleine Punte A, De Ridder D, Van De Heyning P. On the necessity of full length electrical  
11 cochlear stimulation to suppress severe tinnitus in single-sided deafness. *Hear Res*  
12 [Internet]. 2013;295:24–9. Available from: <http://dx.doi.org/10.1016/j.heares.2012.08.003>  
13  
14 15. Ahmed M., Khater A. Tinnitus suppression after cochlear implantation in patients with  
15 single-sided deafness. *Egypt J Otolaryngol.* 2017;33(1):61.  
16  
17 16. Arts RAGJ, George ELJ, Janssen M, Griessner A, Zierhofer C, Stokroos RJ. Tinnitus  
18 Suppression by Intracochlear Electrical Stimulation in Single Sided Deafness – A  
19 Prospective Clinical Trial: Follow-Up. *PLoS One* [Internet]. 2016 Apr 25;11(4):e0153131.  
20 Available from: <https://doi.org/10.1371/journal.pone.0153131>  
21  
22 17. Sampaio ALL, Araújo MFS, Oliveira CACP. New Criteria of Indication and Selection of  
23 Patients to Cochlear Implant. *Int J Otolaryngol.* 2011;2011:1–13.  
24  
25 18. Chan AW, Tetzlaff JM, Gøtzsche PC, Altman DG, Mann H, Berlin JA, et al. SPIRIT 2013  
26 explanation and elaboration: guidance for protocols of clinical trials. *BMJ.* 2013;  
27  
28 19. UMC Utrecht. Julius Centre Randomisation platform. Available from:  
29 <http://www.juliuscentrum.nl/random/>  
30  
31 20. Rabau S, Wouters K, Van de Heyning P. Validation and translation of the Dutch tinnitus  
32 functional index. *B-ENT* [Internet]. 2014;10(4):251–8. Available from:  
33 [http://www.embase.com/search/results?subaction=viewrecord&from=export&id=L603263](http://www.embase.com/search/results?subaction=viewrecord&from=export&id=L603263036)  
34 036  
35  
36 21. Meikle MB, Henry JA, Griest SE, Stewart BJ, Abrams HB, McArdle R, et al. The tinnitus  
37 functional index: Development of a new clinical measure for chronic, intrusive tinnitus. *Ear*  
38 *Hear.* 2012;  
39  
40 22. Valente D. INTERNATIONAL STANDARD Acoustics — Loudness scaling by means.  
41 2006;2006.  
42  
43 23. Neff P, Langguth B, Schecklmann M, Hannemann R, Schlee W. Comparing Three  
44 Established Methods for Tinnitus Pitch Matching With Respect to Reliability, Matching  
45 Duration, and Subjective Satisfaction. *Trends Hear.* 2019;23.  
46  
47 24. Arts RAGJ, George ELJ, Chenault MN, Stokroos RJ. Optimizing intracochlear electrical  
48 stimulation to suppress tinnitus. *Ear Hear.* 2015 Jan;36(1):125–35.  
49  
50  
51  
52  
53  
54  
55  
56  
57  
58  
59  
60

- 1
- 2
- 3 25. Theelen-Van Den Hoek FL, Boymans M, Stainsby T, Dreschler WA. Reliability of
- 4 categorical loudness scaling in the electrical domain. *Int J Audiol*. 2014;53(6):409–17.
- 5
- 6 26. BV C. Castor electronic data capture. Amsterdam, The Netherlands. 2018;
- 7
- 8 27. Guy W. CGI Clinical Global Impressions. ECDEU Assess Man. 1976;
- 9
- 10 28. Hendry J, Chin A, Swan IRC, Akeroyd MA, Browning GG. The Glasgow Benefit Inventory:
- 11 A systematic review of the use and value of an otorhinolaryngological generic patient-
- 12 recorded outcome measure. *Clin Otolaryngol*. 2016;41(3):259–75.
- 13
- 14 29. Health Policy. EuroQol - a new facility for the measurement of health-related quality of life.
- 15 1990;
- 16
- 17 30. Gatehouse S, Noble I. The Speech, Spatial and Qualities of Hearing Scale (SSQ). *Int J*
- 18 *Audiol*. 2004;
- 19
- 20 31. Beck AT, Steer RA, Ball R, Ranieri WF. Comparison of Beck depression inventories -IA
- 21 and -II in psychiatric outpatients. *J Pers Assess*. 1996;
- 22
- 23 32. Bjelland I, Dahl AA, Haug TT, Neckelmann D. The validity of the Hospital Anxiety and
- 24 Depression Scale. *J Psychosom Res*. 2002;52(2):69–77.
- 25
- 26 33. Zigmond AS, Snaith RP. The Hospital Anxiety and Depression Scale. *Acta Psychiatr*
- 27 *Scand*. 1983;
- 28
- 29
- 30 34. Schulz KF, Altman DC, Moher D. CONSORT 2010 Statement: Updated guidelines for
- 31 reporting parallel group randomised trials. *Ital J Public Health*. 2010;
- 32
- 33
- 34
- 35
- 36
- 37
- 38
- 39
- 40
- 41
- 42
- 43
- 44
- 45
- 46
- 47
- 48
- 49
- 50
- 51
- 52
- 53
- 54
- 55
- 56
- 57
- 58
- 59
- 60

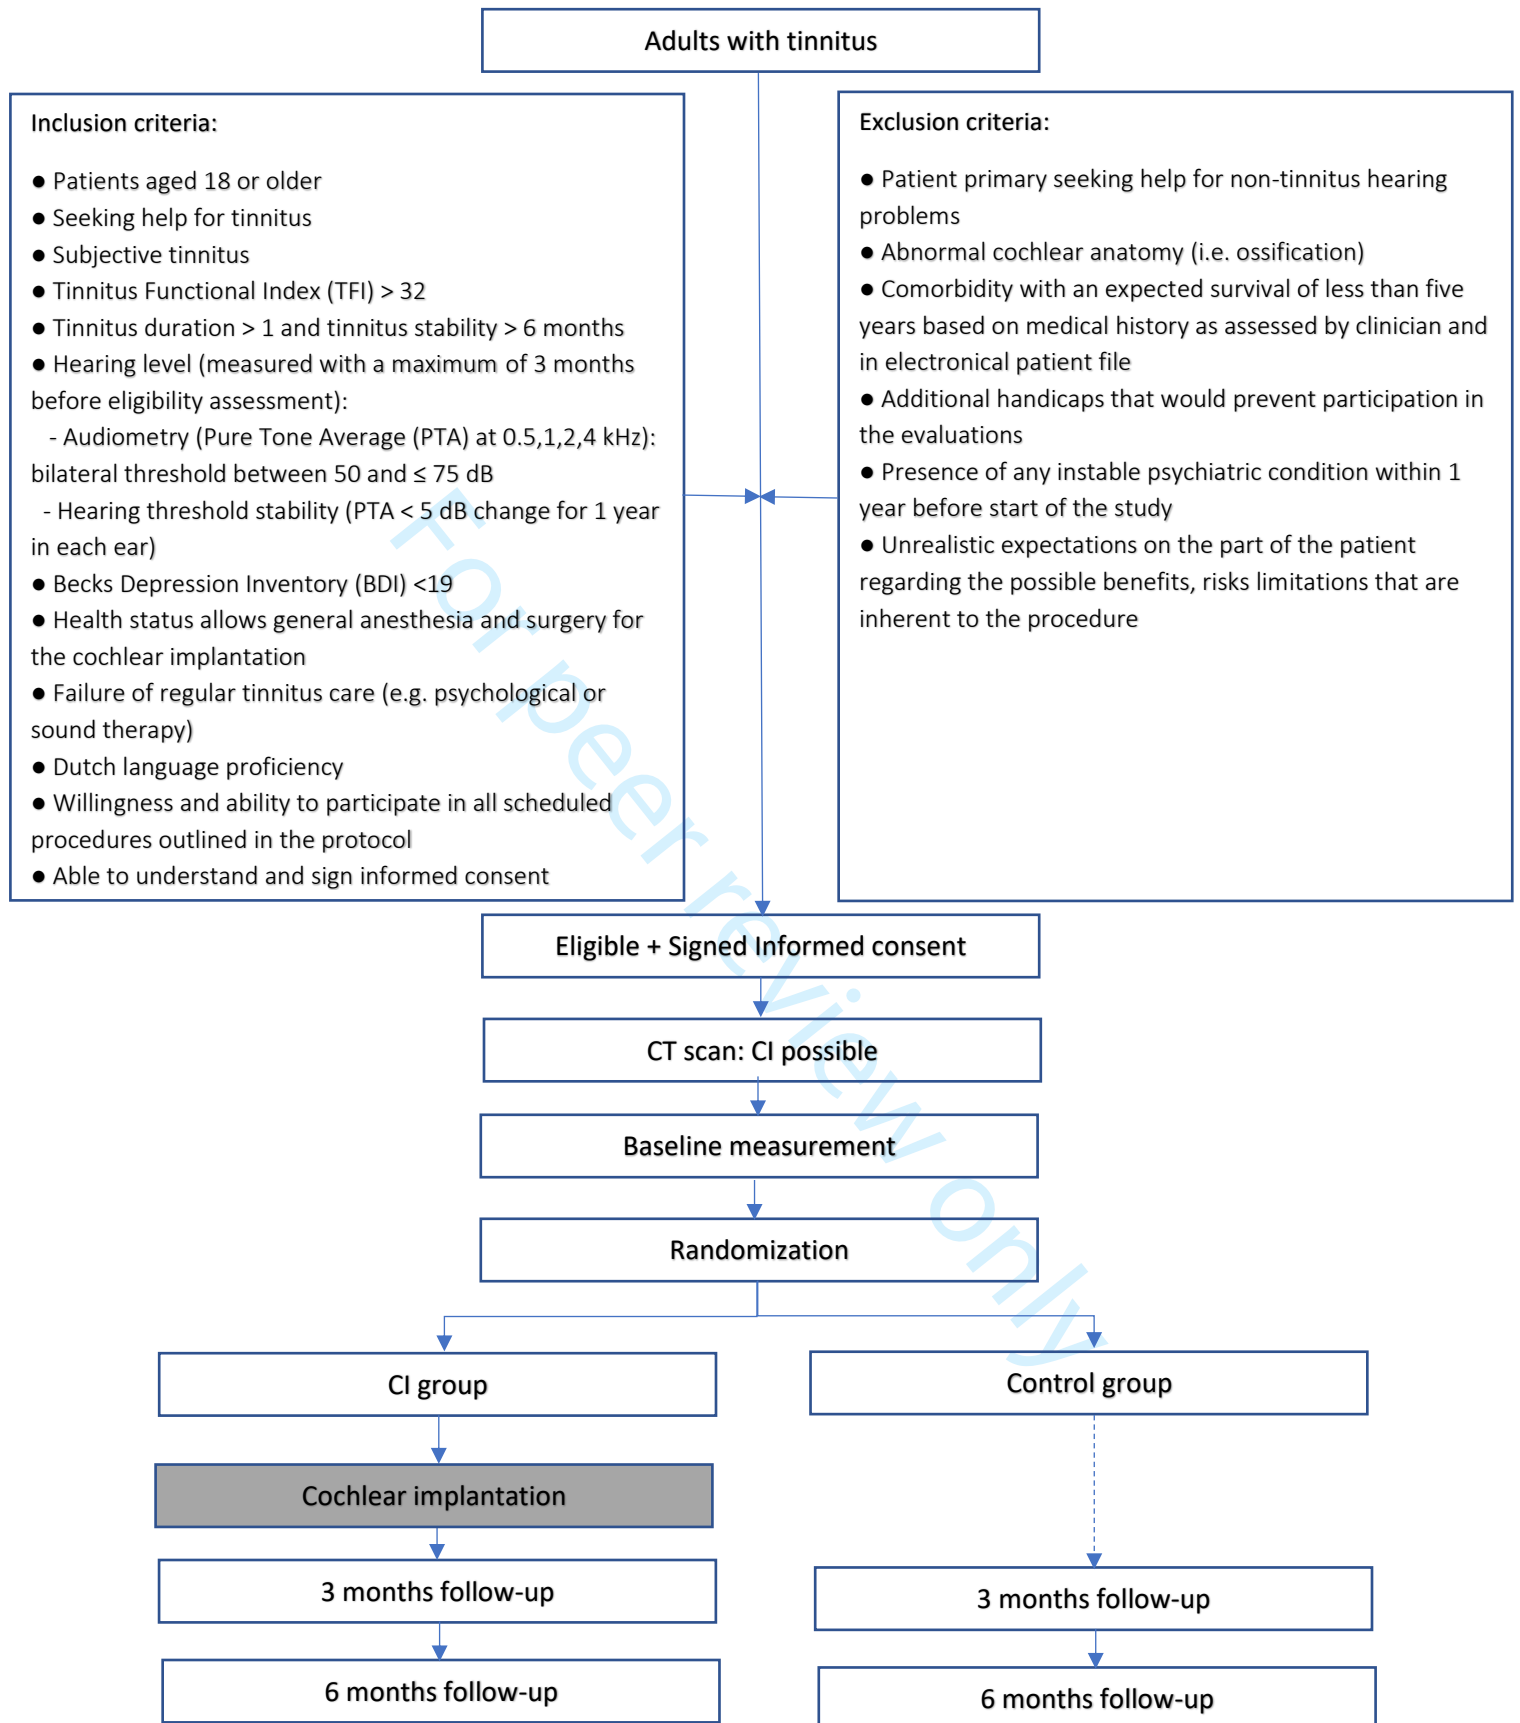

Figure 1. Study flowchart.

CI: cochlear implant group; Control: control group

# Reporting checklist for protocol of a clinical trial.

Based on the SPIRIT guidelines.

## Instructions to authors

Complete this checklist by entering the page numbers from your manuscript where readers will find each of the items listed below.

Your article may not currently address all the items on the checklist. Please modify your text to include the missing information. If you are certain that an item does not apply, please write "n/a" and provide a short explanation.

Upload your completed checklist as an extra file when you submit to a journal.

In your methods section, say that you used the SPIRIT reporting guidelines, and cite them as:

Chan A-W, Tetzlaff JM, Altman DG, Laupacis A, Gøtzsche PC, Krleža-Jerić K, Hróbjartsson A, Mann H, Dickersin K, Berlin J, Doré C, Parulekar W, Summerskill W, Groves T, Schulz K, Sox H, Rockhold FW, Rennie D, Moher D. SPIRIT 2013 Statement: Defining standard protocol items for clinical trials. *Ann Intern Med.* 2013;158(3):200-207

|                                   |                                                                                                                                 |  | Page   |
|-----------------------------------|---------------------------------------------------------------------------------------------------------------------------------|--|--------|
|                                   | Reporting Item                                                                                                                  |  | Number |
| <b>Administrative information</b> |                                                                                                                                 |  |        |
| Title                             | <a href="#">#1</a> Descriptive title identifying the study design, population, interventions, and, if applicable, trial acronym |  | 1      |



|    |                     |                     |                                                            |     |
|----|---------------------|---------------------|------------------------------------------------------------|-----|
| 1  | Trial registration  | <a href="#">#2a</a> | Trial identifier and registry name. If not yet registered, | 1   |
| 2  |                     |                     | name of intended registry                                  |     |
| 3  |                     |                     |                                                            |     |
| 4  |                     |                     |                                                            |     |
| 5  |                     |                     |                                                            |     |
| 6  | Trial registration: | <a href="#">#2b</a> | All items from the World Health Organization Trial         | n/a |
| 7  | data set            |                     | Registration Data Set                                      |     |
| 8  |                     |                     |                                                            |     |
| 9  |                     |                     |                                                            |     |
| 10 |                     |                     |                                                            |     |
| 11 | Protocol version    | <a href="#">#3</a>  | Date and version identifier                                | 18  |
| 12 |                     |                     |                                                            |     |
| 13 |                     |                     |                                                            |     |
| 14 |                     |                     |                                                            |     |
| 15 | Funding             | <a href="#">#4</a>  | Sources and types of financial, material, and other        | 17  |
| 16 |                     |                     | support                                                    |     |
| 17 |                     |                     |                                                            |     |
| 18 |                     |                     |                                                            |     |
| 19 |                     |                     |                                                            |     |
| 20 | Roles and           | <a href="#">#5a</a> | Names, affiliations, and roles of protocol contributors    | 17  |
| 21 | responsibilities:   |                     |                                                            |     |
| 22 |                     |                     |                                                            |     |
| 23 | contributorship     |                     |                                                            |     |
| 24 |                     |                     |                                                            |     |
| 25 |                     |                     |                                                            |     |
| 26 |                     |                     |                                                            |     |
| 27 |                     |                     |                                                            |     |
| 28 | Roles and           | <a href="#">#5b</a> | Name and contact information for the trial sponsor         | 1   |
| 29 | responsibilities:   |                     |                                                            |     |
| 30 |                     |                     |                                                            |     |
| 31 | sponsor contact     |                     |                                                            |     |
| 32 | information         |                     |                                                            |     |
| 33 |                     |                     |                                                            |     |
| 34 |                     |                     |                                                            |     |
| 35 |                     |                     |                                                            |     |
| 36 |                     |                     |                                                            |     |
| 37 |                     |                     |                                                            |     |
| 38 | Roles and           | <a href="#">#5c</a> | Role of study sponsor and funders, if any, in study        | n/a |
| 39 | responsibilities:   |                     | design; collection, management, analysis, and              |     |
| 40 |                     |                     | interpretation of data; writing of the report; and the     |     |
| 41 | sponsor and funder  |                     | decision to submit the report for publication, including   |     |
| 42 |                     |                     | whether they will have ultimate authority over any of      |     |
| 43 |                     |                     | these activities                                           |     |
| 44 |                     |                     |                                                            |     |
| 45 |                     |                     |                                                            |     |
| 46 |                     |                     |                                                            |     |
| 47 |                     |                     |                                                            |     |
| 48 |                     |                     |                                                            |     |
| 49 |                     |                     |                                                            |     |
| 50 |                     |                     |                                                            |     |
| 51 |                     |                     |                                                            |     |
| 52 | Roles and           | <a href="#">#5d</a> | Composition, roles, and responsibilities of the            | n/a |
| 53 | responsibilities:   |                     | coordinating centre, steering committee, endpoint          |     |
| 54 |                     |                     | adjudication committee, data management team, and          |     |
| 55 | committees          |                     |                                                            |     |
| 56 |                     |                     |                                                            |     |
| 57 |                     |                     |                                                            |     |
| 58 |                     |                     |                                                            |     |
| 59 |                     |                     |                                                            |     |
| 60 |                     |                     |                                                            |     |

1 other individuals or groups overseeing the trial, if  
 2  
 3 applicable (see Item 21a for data monitoring committee)  
 4  
 5

## 6 Introduction

7  
 8  
 9 Background and [#6a](#) Description of research question and justification for 2  
 10  
 11 rationale undertaking the trial, including summary of relevant  
 12  
 13 studies (published and unpublished) examining benefits  
 14  
 15 and harms for each intervention  
 16  
 17

18  
 19 Background and [#6b](#) Explanation for choice of comparators 4  
 20  
 21 rationale: choice of  
 22  
 23 comparators  
 24  
 25

26 Objectives [#7](#) Specific objectives or hypotheses 5  
 27  
 28

29 Trial design [#8](#) Description of trial design including type of trial (eg, 5  
 30  
 31 parallel group, crossover, factorial, single group),  
 32  
 33 allocation ratio, and framework (eg, superiority,  
 34  
 35 equivalence, non-inferiority, exploratory)  
 36  
 37  
 38

## 39 Methods:

40  
 41 Participants,  
 42  
 43 interventions, and  
 44  
 45 outcomes  
 46  
 47  
 48

49 Study setting [#9](#) Description of study settings (eg, community clinic, 5  
 50  
 51 academic hospital) and list of countries where data will be  
 52  
 53 collected. Reference to where list of study sites can be  
 54  
 55 obtained  
 56  
 57  
 58  
 59  
 60

|    |                      |                      |                                                              |      |
|----|----------------------|----------------------|--------------------------------------------------------------|------|
| 1  | Eligibility criteria | <a href="#">#10</a>  | Inclusion and exclusion criteria for participants. If        | 7    |
| 2  |                      |                      |                                                              |      |
| 3  |                      |                      | applicable, eligibility criteria for study centres and       |      |
| 4  |                      |                      | individuals who will perform the interventions (eg,          |      |
| 5  |                      |                      | surgeons, psychotherapists)                                  |      |
| 6  |                      |                      |                                                              |      |
| 7  |                      |                      |                                                              |      |
| 8  |                      |                      |                                                              |      |
| 9  |                      |                      |                                                              |      |
| 10 |                      |                      |                                                              |      |
| 11 | Interventions:       | <a href="#">#11a</a> | Interventions for each group with sufficient detail to allow | 8-9  |
| 12 |                      |                      |                                                              |      |
| 13 | description          |                      | replication, including how and when they will be             |      |
| 14 |                      |                      | administered                                                 |      |
| 15 |                      |                      |                                                              |      |
| 16 |                      |                      |                                                              |      |
| 17 |                      |                      |                                                              |      |
| 18 |                      |                      |                                                              |      |
| 19 | Interventions:       | <a href="#">#11b</a> | Criteria for discontinuing or modifying allocated            | 8-9  |
| 20 |                      |                      |                                                              |      |
| 21 | modifications        |                      | interventions for a given trial participant (eg, drug dose   |      |
| 22 |                      |                      | change in response to harms, participant request, or         |      |
| 23 |                      |                      | improving / worsening disease)                               |      |
| 24 |                      |                      |                                                              |      |
| 25 |                      |                      |                                                              |      |
| 26 |                      |                      |                                                              |      |
| 27 |                      |                      |                                                              |      |
| 28 |                      |                      |                                                              |      |
| 29 | Interventions:       | <a href="#">#11c</a> | Strategies to improve adherence to intervention protocols,   | n/a  |
| 30 |                      |                      |                                                              |      |
| 31 | adherence            |                      | and any procedures for monitoring adherence (eg, drug        |      |
| 32 |                      |                      | tablet return; laboratory tests)                             |      |
| 33 |                      |                      |                                                              |      |
| 34 |                      |                      |                                                              |      |
| 35 |                      |                      |                                                              |      |
| 36 | Interventions:       | <a href="#">#11d</a> | Relevant concomitant care and interventions that are         | 9    |
| 37 |                      |                      |                                                              |      |
| 38 | concomitant care     |                      | permitted or prohibited during the trial                     |      |
| 39 |                      |                      |                                                              |      |
| 40 |                      |                      |                                                              |      |
| 41 |                      |                      |                                                              |      |
| 42 | Outcomes             | <a href="#">#12</a>  | Primary, secondary, and other outcomes, including the        | 9-14 |
| 43 |                      |                      | specific measurement variable (eg, systolic blood            |      |
| 44 |                      |                      | pressure), analysis metric (eg, change from baseline, final  |      |
| 45 |                      |                      | value, time to event), method of aggregation (eg, median,    |      |
| 46 |                      |                      | proportion), and time point for each outcome. Explanation    |      |
| 47 |                      |                      | of the clinical relevance of chosen efficacy and harm        |      |
| 48 |                      |                      | outcomes is strongly recommended                             |      |
| 49 |                      |                      |                                                              |      |
| 50 |                      |                      |                                                              |      |
| 51 |                      |                      |                                                              |      |
| 52 |                      |                      |                                                              |      |
| 53 |                      |                      |                                                              |      |
| 54 |                      |                      |                                                              |      |
| 55 |                      |                      |                                                              |      |
| 56 |                      |                      |                                                              |      |
| 57 |                      |                      |                                                              |      |
| 58 |                      |                      |                                                              |      |
| 59 |                      |                      |                                                              |      |
| 60 |                      |                      |                                                              |      |

|    |                           |                      |                                                            |    |
|----|---------------------------|----------------------|------------------------------------------------------------|----|
| 1  | Participant timeline      | <a href="#">#13</a>  | Time schedule of enrolment, interventions (including any   | 10 |
| 2  |                           |                      | run-ins and washouts), assessments, and visits for         |    |
| 3  |                           |                      | participants. A schematic diagram is highly recommended    |    |
| 4  |                           |                      | (see Figure)                                               |    |
| 5  |                           |                      |                                                            |    |
| 6  |                           |                      |                                                            |    |
| 7  |                           |                      |                                                            |    |
| 8  |                           |                      |                                                            |    |
| 9  |                           |                      |                                                            |    |
| 10 |                           |                      |                                                            |    |
| 11 | Sample size               | <a href="#">#14</a>  | Estimated number of participants needed to achieve         | 9  |
| 12 |                           |                      | study objectives and how it was determined, including      |    |
| 13 |                           |                      | clinical and statistical assumptions supporting any sample |    |
| 14 |                           |                      | size calculations                                          |    |
| 15 |                           |                      |                                                            |    |
| 16 |                           |                      |                                                            |    |
| 17 |                           |                      |                                                            |    |
| 18 |                           |                      |                                                            |    |
| 19 |                           |                      |                                                            |    |
| 20 |                           |                      |                                                            |    |
| 21 | Recruitment               | <a href="#">#15</a>  | Strategies for achieving adequate participant enrolment to | 8  |
| 22 |                           |                      | reach target sample size                                   |    |
| 23 |                           |                      |                                                            |    |
| 24 |                           |                      |                                                            |    |
| 25 |                           |                      |                                                            |    |
| 26 | <b>Methods:</b>           |                      |                                                            |    |
| 27 |                           |                      |                                                            |    |
| 28 | <b>Assignment of</b>      |                      |                                                            |    |
| 29 | <b>interventions (for</b> |                      |                                                            |    |
| 30 | <b>controlled trials)</b> |                      |                                                            |    |
| 31 |                           |                      |                                                            |    |
| 32 |                           |                      |                                                            |    |
| 33 |                           |                      |                                                            |    |
| 34 |                           |                      |                                                            |    |
| 35 |                           |                      |                                                            |    |
| 36 | Allocation: sequence      | <a href="#">#16a</a> | Method of generating the allocation sequence (eg,          | 8  |
| 37 | generation                |                      | computer-generated random numbers), and list of any        |    |
| 38 |                           |                      | factors for stratification. To reduce predictability of a  |    |
| 39 |                           |                      | random sequence, details of any planned restriction (eg,   |    |
| 40 |                           |                      | blocking) should be provided in a separate document that   |    |
| 41 |                           |                      | is unavailable to those who enrol participants or assign   |    |
| 42 |                           |                      | interventions                                              |    |
| 43 |                           |                      |                                                            |    |
| 44 |                           |                      |                                                            |    |
| 45 |                           |                      |                                                            |    |
| 46 |                           |                      |                                                            |    |
| 47 |                           |                      |                                                            |    |
| 48 |                           |                      |                                                            |    |
| 49 |                           |                      |                                                            |    |
| 50 |                           |                      |                                                            |    |
| 51 |                           |                      |                                                            |    |
| 52 |                           |                      |                                                            |    |
| 53 | Allocation                | <a href="#">#16b</a> | Mechanism of implementing the allocation sequence (eg,     | 8  |
| 54 | concealment               |                      | central telephone; sequentially numbered, opaque,          |    |
| 55 |                           |                      |                                                            |    |
| 56 |                           |                      |                                                            |    |
| 57 |                           |                      |                                                            |    |
| 58 | mechanism                 |                      |                                                            |    |
| 59 |                           |                      |                                                            |    |
| 60 |                           |                      |                                                            |    |

sealed envelopes), describing any steps to conceal the sequence until interventions are assigned

Allocation: [#16c](#) Who will generate the allocation sequence, who will enrol participants, and who will assign participants to interventions 8

Blinding (masking) [#17a](#) Who will be blinded after assignment to interventions (eg, trial participants, care providers, outcome assessors, data analysts), and how 8

Blinding (masking): [#17b](#) If blinded, circumstances under which unblinding is permissible, and procedure for revealing a participant's allocated intervention during the trial n/a

**Methods: Data collection, management, and analysis**

Data collection plan [#18a](#) Plans for assessment and collection of outcome, baseline, and other trial data, including any related processes to promote data quality (eg, duplicate measurements, training of assessors) and a description of study instruments (eg, questionnaires, laboratory tests) along with their reliability and validity, if known. Reference to where data collection forms can be found, if not in the protocol 15

|    |                            |                      |                                                                |    |
|----|----------------------------|----------------------|----------------------------------------------------------------|----|
| 1  | Data collection plan:      | <a href="#">#18b</a> | Plans to promote participant retention and complete            | 15 |
| 2  |                            |                      |                                                                |    |
| 3  | retention                  |                      | follow-up, including list of any outcome data to be            |    |
| 4  |                            |                      | collected for participants who discontinue or deviate from     |    |
| 5  |                            |                      | intervention protocols                                         |    |
| 6  |                            |                      |                                                                |    |
| 7  |                            |                      |                                                                |    |
| 8  |                            |                      |                                                                |    |
| 9  |                            |                      |                                                                |    |
| 10 |                            |                      |                                                                |    |
| 11 | Data management            | <a href="#">#19</a>  | Plans for data entry, coding, security, and storage,           | 15 |
| 12 |                            |                      | including any related processes to promote data quality        |    |
| 13 |                            |                      | (eg, double data entry; range checks for data values).         |    |
| 14 |                            |                      | Reference to where details of data management                  |    |
| 15 |                            |                      | procedures can be found, if not in the protocol                |    |
| 16 |                            |                      |                                                                |    |
| 17 |                            |                      |                                                                |    |
| 18 | Statistics: outcomes       | <a href="#">#20a</a> | Statistical methods for analysing primary and secondary        | 14 |
| 19 |                            |                      | outcomes. Reference to where other details of the              |    |
| 20 |                            |                      | statistical analysis plan can be found, if not in the protocol |    |
| 21 |                            |                      |                                                                |    |
| 22 |                            |                      |                                                                |    |
| 23 | Statistics: additional     | <a href="#">#20b</a> | Methods for any additional analyses (eg, subgroup and          | 14 |
| 24 | analyses                   |                      | adjusted analyses)                                             |    |
| 25 |                            |                      |                                                                |    |
| 26 |                            |                      |                                                                |    |
| 27 |                            |                      |                                                                |    |
| 28 | Statistics: analysis       | <a href="#">#20c</a> | Definition of analysis population relating to protocol non-    | 15 |
| 29 | population and             |                      | adherence (eg, as randomised analysis), and any                |    |
| 30 | missing data               |                      | statistical methods to handle missing data (eg, multiple       |    |
| 31 |                            |                      | imputation)                                                    |    |
| 32 |                            |                      |                                                                |    |
| 33 |                            |                      |                                                                |    |
| 34 |                            |                      |                                                                |    |
| 35 |                            |                      |                                                                |    |
| 36 | <b>Methods: Monitoring</b> |                      |                                                                |    |
| 37 |                            |                      |                                                                |    |
| 38 |                            |                      |                                                                |    |
| 39 | Data monitoring:           | <a href="#">#21a</a> | Composition of data monitoring committee (DMC);                | 15 |
| 40 | formal committee           |                      | summary of its role and reporting structure; statement of      |    |
| 41 |                            |                      | whether it is independent from the sponsor and                 |    |
| 42 |                            |                      | competing interests; and reference to where further            |    |
| 43 |                            |                      |                                                                |    |
| 44 |                            |                      |                                                                |    |
| 45 |                            |                      |                                                                |    |
| 46 |                            |                      |                                                                |    |
| 47 |                            |                      |                                                                |    |
| 48 |                            |                      |                                                                |    |
| 49 |                            |                      |                                                                |    |
| 50 |                            |                      |                                                                |    |
| 51 |                            |                      |                                                                |    |
| 52 |                            |                      |                                                                |    |
| 53 |                            |                      |                                                                |    |
| 54 |                            |                      |                                                                |    |
| 55 |                            |                      |                                                                |    |
| 56 |                            |                      |                                                                |    |
| 57 |                            |                      |                                                                |    |
| 58 |                            |                      |                                                                |    |
| 59 |                            |                      |                                                                |    |
| 60 |                            |                      |                                                                |    |

1 details about its charter can be found, if not in the  
 2  
 3 protocol. Alternatively, an explanation of why a DMC is  
 4  
 5 not needed  
 6  
 7

|    |                      |                      |                                                              |        |
|----|----------------------|----------------------|--------------------------------------------------------------|--------|
| 8  | Data monitoring:     | <a href="#">#21b</a> | Description of any interim analyses and stopping             | 14     |
| 9  | interim analysis     |                      | guidelines, including who will have access to these          |        |
| 10 |                      |                      | interim results and make the final decision to terminate     |        |
| 11 |                      |                      | the trial                                                    |        |
| 12 |                      |                      |                                                              |        |
| 13 |                      |                      |                                                              |        |
| 14 |                      |                      |                                                              |        |
| 15 |                      |                      |                                                              |        |
| 16 |                      |                      |                                                              |        |
| 17 |                      |                      |                                                              |        |
| 18 | Harms                | <a href="#">#22</a>  | Plans for collecting, assessing, reporting, and managing     | 15     |
| 19 |                      |                      | solicited and spontaneously reported adverse events and      |        |
| 20 |                      |                      | other unintended effects of trial interventions or trial     |        |
| 21 |                      |                      | conduct                                                      |        |
| 22 |                      |                      |                                                              |        |
| 23 |                      |                      |                                                              |        |
| 24 |                      |                      |                                                              |        |
| 25 |                      |                      |                                                              |        |
| 26 |                      |                      |                                                              |        |
| 27 |                      |                      |                                                              |        |
| 28 | Auditing             | <a href="#">#23</a>  | Frequency and procedures for auditing trial conduct, if      | n/a    |
| 29 |                      |                      | any, and whether the process will be independent from        |        |
| 30 |                      |                      | investigators and the sponsor                                |        |
| 31 |                      |                      |                                                              |        |
| 32 |                      |                      |                                                              |        |
| 33 |                      |                      |                                                              |        |
| 34 |                      |                      |                                                              |        |
| 35 | <b>Ethics and</b>    |                      |                                                              |        |
| 36 | <b>dissemination</b> |                      |                                                              |        |
| 37 |                      |                      |                                                              |        |
| 38 |                      |                      |                                                              |        |
| 39 |                      |                      |                                                              |        |
| 40 |                      |                      |                                                              |        |
| 41 | Research ethics      | <a href="#">#24</a>  | Plans for seeking research ethics committee / institutional  | 15, 17 |
| 42 | approval             |                      | review board (REC / IRB) approval                            |        |
| 43 |                      |                      |                                                              |        |
| 44 |                      |                      |                                                              |        |
| 45 |                      |                      |                                                              |        |
| 46 | Protocol             | <a href="#">#25</a>  | Plans for communicating important protocol modifications     | 15     |
| 47 | amendments           |                      | (eg, changes to eligibility criteria, outcomes, analyses) to |        |
| 48 |                      |                      | relevant parties (eg, investigators, REC / IRBs, trial       |        |
| 49 |                      |                      | participants, trial registries, journals, regulators)        |        |
| 50 |                      |                      |                                                              |        |
| 51 |                      |                      |                                                              |        |
| 52 |                      |                      |                                                              |        |
| 53 |                      |                      |                                                              |        |
| 54 |                      |                      |                                                              |        |
| 55 |                      |                      |                                                              |        |
| 56 |                      |                      |                                                              |        |
| 57 |                      |                      |                                                              |        |
| 58 |                      |                      |                                                              |        |
| 59 |                      |                      |                                                              |        |
| 60 |                      |                      |                                                              |        |

|    |                       |                      |                                                                |     |
|----|-----------------------|----------------------|----------------------------------------------------------------|-----|
| 1  | Consent or assent     | <a href="#">#26a</a> | Who will obtain informed consent or assent from potential      | 8   |
| 2  |                       |                      | trial participants or authorised surrogates, and how (see      |     |
| 3  |                       |                      | Item 32)                                                       |     |
| 4  |                       |                      |                                                                |     |
| 5  |                       |                      |                                                                |     |
| 6  |                       |                      |                                                                |     |
| 7  |                       |                      |                                                                |     |
| 8  |                       |                      |                                                                |     |
| 9  | Consent or assent:    | <a href="#">#26b</a> | Additional consent provisions for collection and use of        | 15  |
| 10 | ancillary studies     |                      | participant data and biological specimens in ancillary         |     |
| 11 |                       |                      | studies, if applicable                                         |     |
| 12 |                       |                      |                                                                |     |
| 13 |                       |                      |                                                                |     |
| 14 |                       |                      |                                                                |     |
| 15 |                       |                      |                                                                |     |
| 16 | Confidentiality       | <a href="#">#27</a>  | How personal information about potential and enrolled          | 15  |
| 17 |                       |                      | participants will be collected, shared, and maintained in      |     |
| 18 |                       |                      | order to protect confidentiality before, during, and after     |     |
| 19 |                       |                      | the trial                                                      |     |
| 20 |                       |                      |                                                                |     |
| 21 |                       |                      |                                                                |     |
| 22 |                       |                      |                                                                |     |
| 23 |                       |                      |                                                                |     |
| 24 |                       |                      |                                                                |     |
| 25 |                       |                      |                                                                |     |
| 26 | Declaration of        | <a href="#">#28</a>  | Financial and other competing interests for principal          | 17  |
| 27 | interests             |                      | investigators for the overall trial and each study site        |     |
| 28 |                       |                      |                                                                |     |
| 29 |                       |                      |                                                                |     |
| 30 |                       |                      |                                                                |     |
| 31 | Data access           | <a href="#">#29</a>  | Statement of who will have access to the final trial           | 15  |
| 32 |                       |                      | dataset, and disclosure of contractual agreements that         |     |
| 33 |                       |                      | limit such access for investigators                            |     |
| 34 |                       |                      |                                                                |     |
| 35 |                       |                      |                                                                |     |
| 36 |                       |                      |                                                                |     |
| 37 |                       |                      |                                                                |     |
| 38 |                       |                      |                                                                |     |
| 39 | Ancillary and post    | <a href="#">#30</a>  | Provisions, if any, for ancillary and post-trial care, and for | n/a |
| 40 | trial care            |                      | compensation to those who suffer harm from trial               |     |
| 41 |                       |                      | participation                                                  |     |
| 42 |                       |                      |                                                                |     |
| 43 |                       |                      |                                                                |     |
| 44 |                       |                      |                                                                |     |
| 45 |                       |                      |                                                                |     |
| 46 |                       |                      |                                                                |     |
| 47 | Dissemination policy: | <a href="#">#31a</a> | Plans for investigators and sponsor to communicate trial       | 15  |
| 48 | trial results         |                      | results to participants, healthcare professionals, the         |     |
| 49 |                       |                      | public, and other relevant groups (eg, via publication,        |     |
| 50 |                       |                      | reporting in results databases, or other data sharing          |     |
| 51 |                       |                      | arrangements), including any publication restrictions          |     |
| 52 |                       |                      |                                                                |     |
| 53 |                       |                      |                                                                |     |
| 54 |                       |                      |                                                                |     |
| 55 |                       |                      |                                                                |     |
| 56 |                       |                      |                                                                |     |
| 57 |                       |                      |                                                                |     |
| 58 |                       |                      |                                                                |     |
| 59 |                       |                      |                                                                |     |
| 60 |                       |                      |                                                                |     |



1 Dissemination policy: [#31b](#) Authorship eligibility guidelines and any intended use of n/a  
 2  
 3 authorship professional writers  
 4  
 5

6 Dissemination policy: [#31c](#) Plans, if any, for granting public access to the full n/a  
 7  
 8 reproducible protocol, participant-level dataset, and statistical code  
 9  
 10 research  
 11  
 12

## 13 Appendices

14  
 15  
 16  
 17 Informed consent [#32](#) Model consent form and other related documentation n/a  
 18  
 19 materials given to participants and authorised surrogates  
 20  
 21

22  
 23 Biological specimens [#33](#) Plans for collection, laboratory evaluation, and storage of n/a  
 24  
 25 biological specimens for genetic or molecular analysis in  
 26  
 27 the current trial and for future use in ancillary studies, if  
 28  
 29 applicable  
 30  
 31

32  
 33 The SPIRIT checklist is distributed under the terms of the Creative Commons Attribution License CC-  
 34  
 35 BY-ND 3.0. This checklist was completed on 14. July 2020 using <https://www.goodreports.org/>, a tool  
 36  
 37 made by the [EQUATOR Network](#) in collaboration with [Penelope.ai](#)  
 38  
 39  
 40  
 41  
 42  
 43  
 44  
 45  
 46  
 47  
 48  
 49  
 50  
 51  
 52  
 53  
 54  
 55  
 56  
 57  
 58  
 59  
 60

# BMJ Open

## Cochlear implantation for tinnitus in adults with bilateral hearing loss: protocol of a randomized controlled trial

|                                 |                                                                                                                                                                                                                                                                                                                                                                                                                                                                                                                                                                                                                             |
|---------------------------------|-----------------------------------------------------------------------------------------------------------------------------------------------------------------------------------------------------------------------------------------------------------------------------------------------------------------------------------------------------------------------------------------------------------------------------------------------------------------------------------------------------------------------------------------------------------------------------------------------------------------------------|
| Journal:                        | <i>BMJ Open</i>                                                                                                                                                                                                                                                                                                                                                                                                                                                                                                                                                                                                             |
| Manuscript ID                   | bmjopen-2020-043288.R1                                                                                                                                                                                                                                                                                                                                                                                                                                                                                                                                                                                                      |
| Article Type:                   | Protocol                                                                                                                                                                                                                                                                                                                                                                                                                                                                                                                                                                                                                    |
| Date Submitted by the Author:   | 25-Mar-2021                                                                                                                                                                                                                                                                                                                                                                                                                                                                                                                                                                                                                 |
| Complete List of Authors:       | Assouly, Kelly; University Medical Centre Utrecht Brain Centre, Otorhinolaryngology, Head and Neck Surgery<br>Smit, Adriana; University Medisch Centrum Utrecht, Department of Otorhinolaryngology, Head and Neck Surgery<br>Stegeman, Inge; University Medical Center Utrecht, Department of Otorhinolaryngology, Head and Neck Surgery<br>Rhebergen, Koen S. ; University Medisch Centrum Utrecht, Department of Otorhinolaryngology, Head and Neck Surgery<br>van Dijk, Bas; Cochlear Technology Center<br>Stokroos, Robert; University Medical Center Utrecht, Department of Otorhinolaryngology, Head and Neck Surgery |
| <b>Primary Subject Heading</b>: | Ear, nose and throat/otolaryngology                                                                                                                                                                                                                                                                                                                                                                                                                                                                                                                                                                                         |
| Secondary Subject Heading:      | Evidence based practice                                                                                                                                                                                                                                                                                                                                                                                                                                                                                                                                                                                                     |
| Keywords:                       | OTOLARYNGOLOGY, Audiology < OTOLARYNGOLOGY, Adult otolaryngology < OTOLARYNGOLOGY                                                                                                                                                                                                                                                                                                                                                                                                                                                                                                                                           |
|                                 |                                                                                                                                                                                                                                                                                                                                                                                                                                                                                                                                                                                                                             |

SCHOLARONE™  
Manuscripts



I, the Submitting Author has the right to grant and does grant on behalf of all authors of the Work (as defined in the below author licence), an exclusive licence and/or a non-exclusive licence for contributions from authors who are: i) UK Crown employees; ii) where BMJ has agreed a CC-BY licence shall apply, and/or iii) in accordance with the terms applicable for US Federal Government officers or employees acting as part of their official duties; on a worldwide, perpetual, irrevocable, royalty-free basis to BMJ Publishing Group Ltd ("BMJ") its licensees and where the relevant Journal is co-owned by BMJ to the co-owners of the Journal, to publish the Work in this journal and any other BMJ products and to exploit all rights, as set out in our [licence](#).

The Submitting Author accepts and understands that any supply made under these terms is made by BMJ to the Submitting Author unless you are acting as an employee on behalf of your employer or a postgraduate student of an affiliated institution which is paying any applicable article publishing charge ("APC") for Open Access articles. Where the Submitting Author wishes to make the Work available on an Open Access basis (and intends to pay the relevant APC), the terms of reuse of such Open Access shall be governed by a Creative Commons licence – details of these licences and which [Creative Commons](#) licence will apply to this Work are set out in our licence referred to above.

Other than as permitted in any relevant BMJ Author's Self Archiving Policies, I confirm this Work has not been accepted for publication elsewhere, is not being considered for publication elsewhere and does not duplicate material already published. I confirm all authors consent to publication of this Work and authorise the granting of this licence.

# Cochlear implantation for tinnitus in adults with bilateral hearing loss: protocol of a randomized controlled trial

**K.S. Kelly Assouly<sup>1,2,3\*</sup>, L. Adriana Smit<sup>1,2</sup>, Inge Stegeman<sup>1,2</sup>, S. Koen Rhebergen<sup>1,2</sup>, Bas van Dijk<sup>3</sup> and J. Robert Stokroos<sup>1,2</sup>**

<sup>1</sup>Department of Otorhinolaryngology and Head & Neck Surgery, University Medical Center Utrecht, the Netherlands

<sup>2</sup>Department of Clinical and Experimental Neuroscience, University Medical Center Utrecht Brain Center, Utrecht University, Utrecht, The Netherlands

<sup>3</sup>Cochlear Technology Center, Mechelen, Belgium

\*Corresponding author:

Postal address: University Medical Center Utrecht, Room number H.02.104, P.O. Box 85500,

3508 GA UTRECHT

Tel: +3188755555

E-mail: [K.K.S.Assouly@umcutrecht.nl](mailto:K.K.S.Assouly@umcutrecht.nl)

## Abstract

### Introduction

Tinnitus is the perception of sound without an external stimulus, often experienced as a ringing, buzzing sound. Subjective tinnitus is assumed to originate from changes in neural activity caused by reduced or lack of auditory input, for instance due to hearing loss. Since auditory deprivation is thought to be one of the causes of tinnitus, increasing the auditory input by cochlear implantation might be a possible treatment. In studies assessing cochlear implantation for patients with hearing loss, tinnitus relief was seen as a secondary outcome. Therefore, we will assess the effect of cochlear implantation in patients with primarily tinnitus complaints.

### Method and analysis

In this randomized controlled trial starting in January 2021 at the ENT department of the UMC Utrecht (the Netherlands), patients with a primary complaint of tinnitus will be included. Fifty patients (Tinnitus Functional Index (TFI)  $\geq 32$ , Beck's Depression Index (BDI)  $< 19$ , pure tone average at 0.5, 1, 2, 4 kHz: bilateral threshold between 50 and  $\leq 75$  dB) will be randomized towards cochlear implantation or no intervention. Primary outcome of the study is tinnitus burden as measured by the TFI. Outcomes of interest are tinnitus severity, hearing performances (tinnitus pitch and loudness, speech perception), quality of life, depression and patient related changes. Outcomes will be evaluated prior to implantation and at 3 and 6 months after the surgery. The control group will receive questionnaires at 3 and 6 months after randomization. We expect a significant difference between the cochlear implant recipients and the control group for tinnitus burden.

### Ethics and dissemination

This research protocol was approved by the Institutional Review Board of the University Medical Center (UMC) Utrecht (NL70319.041.19, V5.0, January 2021). The trial results will be made accessible to the public in a peer-review journal.

Trial registration NL8693.

Keywords: Tinnitus, Cochlear implantation, Bilateral hearing loss

## Strengths and limitations of this study

- The randomized controlled study allows for high quality assessment of outcomes of cochlear implantation for patients suffering primarily from tinnitus and secondarily from moderate to moderately severe bilateral hearing loss.
- Outcomes of interest are not limited to tinnitus burden but also consider anxiety and depression, quality of life and patient related changes.
- The intervention can induce risks associated with surgery and a residual hearing deterioration in the ear implanted which will be monitored by electrocochleography measurement.
- This study is a further step towards evidence-based medicine for the clinical efficacy of cochlear implants as a tinnitus treatment.

## Background

Tinnitus is the perception of sound without an external stimulus, often experienced as a ringing or buzzing sound [1,2]. It is a common symptom with an approximate prevalence of 10-30%, depending on the selected population [3], increasing to 30% of adults over the age of 50 years [4]. Tinnitus can be chronic and disabling for those individuals affected by it. It is a complex condition, in which many components are responsible for perceived burden, like loudness, comorbidity and sleep problems. The heterogeneous aspect of the disease is also accountable for differences in the tinnitus itself: localization, sound characteristics, temporal course and underlying cause. The tinnitus burden and the individual needs of patients for tinnitus related health care are various. While the underlying etiology of tinnitus is still debated, one hypothesis is that the tinnitus arises from changes in neural activity caused by reduced or lack of auditory input due to hearing loss which often accompanies the tinnitus [5,6]. Till date, the only evidence-based therapy for the reduction of tinnitus burden is cognitive behavioral therapy (CBT) [5,7–9] which is offered as standard clinical care in many countries in people with bothersome tinnitus [10]. However, this therapy only improves tinnitus distress but does not reduce tinnitus loudness [11]. Sound therapy is also considered as a recommendation for patients with hearing loss according to European guidelines but there is a lack of conclusive evidence [10,12,13].

Since auditory deprivation is thought to be one of the causes of tinnitus, increasing the auditory input by cochlear implantation might be a possible treatment option. This hypothesis is confirmed by observations in studies assessing the effectiveness of cochlear implantation to restore hearing function in case of bilateral deafness, where tinnitus reduction is one of the secondary outcomes [14]. Analyzing the effect of intracochlear electrical stimulation with a cochlear implant (CI) on primarily tinnitus complaints has been investigated by only few studies. All studies assessing the effect of cochlear implantation for tinnitus concerned cases with single-sided deafness [15–20] or patients with asymmetrical hearing loss [6]. They all reported a significant tinnitus reduction after implantation. So far, there is no high level of evidence of the effect of intracochlear stimulation as an intervention for primary tinnitus complaint in case of bilateral moderate to severe hearing loss [14].

Above mentioned studies provide the first evidence of possible effectiveness of cochlear implantation for the reduction of tinnitus burden. To provide clear evidence of the effectiveness of cochlear implantation for the suppression of tinnitus complaints, a statistically powered study is needed aiming at patients with tinnitus as their primary complaint instead of hearing loss. To what extent electrical stimulation can reduce tinnitus in patients with bilateral moderate to severe hearing loss (just below the current CI indication), but with primary complaint of tinnitus, is

1  
2  
3 unknown [21]. Therefore, we aim to study the effect of cochlear implantation on tinnitus burden in  
4 patients suffering primarily from tinnitus and failed standard clinical care. For these patients which  
5 also have a bilateral moderate to severe hearing loss a randomized controlled trial will be  
6 conducted in which cochlear implantation will be compared to no intervention.  
7  
8  
9  
10

## 11 **Method and analysis**

### 12 **Study objectives**

13  
14 The primary objective of this study is to assess the effect of electrical stimulation by a CI on tinnitus  
15 burden, measured with the Tinnitus Functional Index (TFI) at 6 months after cochlear implantation.  
16 Secondary outcomes are to assess the effect of CI on tinnitus severity, tinnitus pitch and loudness,  
17 auditory function, speech recognition, quality of life, symptoms of depression and anxiety, patient  
18 reported change in order to attest treatment-related differences.  
19  
20  
21  
22  
23  
24

### 25 **Patient involvement**

26 Patients were not involved in the design, or conduct, or reporting, or dissemination plans of the study.  
27  
28  
29  
30

### 31 **Study design and setting**

32  
33 The study is a monocenter clinical trial performed in a tertiary referral clinic (university hospital) in  
34 the Netherlands (University Medical Center Utrecht). The protocol is reported according to the  
35 Standard Protocol Items: Recommendations for Interventional Trials statement [22]. In this  
36 randomized controlled trial (RCT), patients will be randomized into groups: a CI group and a  
37 control group (Fig. 1). 25 patients (CI group) shall receive a CI in the ear mostly affected by tinnitus.  
38 The other 25 patients (control group) shall follow a follow up period of 6 months with no  
39 intervention. The follow-up sessions will take place 3 and 6 months after implantation to assess  
40 the primary outcome of tinnitus burden and secondary outcomes of quality of life, treatment related  
41 outcomes and auditory function.  
42  
43  
44  
45  
46  
47  
48

49 [Insert Figure 1]

### 50 **Study population**

51  
52 The study population consists of patients seeking help for tinnitus, presenting at the outpatient  
53 clinic of Ear, Nose and Throat (ENT) of the UMC Utrecht, The Netherlands. 50 patients aged 18  
54 or older with moderate to severe tinnitus and moderate to severe hearing loss will be included  
55  
56  
57  
58  
59  
60



after fulfilling eligibility and informed consent. They must meet the following criteria to be eligible for the study at randomization.

### Inclusion criteria

The eligibility criteria for patients are:

- Patients aged 18 or older
- Seeking help for tinnitus
- Subjective tinnitus
- Moderate to catastrophic tinnitus burden: Tinnitus Functional Index (TFI) > 32
- Tinnitus duration > 1 year and tinnitus stability > 6 months
- Hearing level (measured with a maximum of 3 months before eligibility assessment):
  - Audiometry (Pure Tone Average (PTA) at 0.5,1,2,4 kHz): bilateral threshold between 50 and  $\leq$  75 dB
  - Hearing threshold stability (PTA < 5 dB change for 1 year in each ear)
- No to mild depression: Becks Depression Inventory (BDI) <19
- Health status allows general anesthesia and surgery for the cochlear implantation
- Failure of regular tinnitus care (e.g. psychological or sound therapy)
- Dutch language proficiency
- Willingness and ability to participate in all scheduled procedures outlined in the protocol
- Able to understand and sign informed consent

### Exclusion criteria

A potential patient who meets any of the following criteria will be excluded from participation in this study:

- Patient primary seeking help for non-tinnitus hearing problems
- Abnormal cochlear anatomy (i.e. ossification)
- Comorbidity with an expected survival of less than five years based on medical history as assessed by clinician and in electronic patient file
- Additional handicaps that would prevent participation in the evaluations
- Presence of any instable psychiatric condition within 1 year before start of the study
- Unrealistic expectations on the part of the patient regarding the possible benefits, risks and limitations that are inherent to the procedure

1  
2  
3 If a patient is eligible for the study, his/her otorhinolaryngologist will ask him/her to participate. The  
4 content of the study will be explained by the patient's otorhinolaryngologist who will provide  
5 him/her written patient information and the informed consent form. Patients will be given 2 weeks  
6 to consider participation. If a patient meets the criteria for in- and exclusion and wants to take part  
7 in the study, the patient will be asked to come to the UMC Utrecht for a computerized tomography  
8 (CT) scan to visualize the anatomy of the mastoid. If the patient's CT scan shows normal cochlear  
9 anatomy, he will, during the same visit, sign the informed consent with a member of the research  
10 team and receive a copy of the consent. After inclusion, baseline measurement will be performed  
11 where after randomization will take place.  
12  
13  
14  
15  
16  
17  
18

### 19 Recruitment status and trial dates

20 Patient enrolment started in January 2021 and will be completed in June 2022. The surveys and  
21 measurement will be performed until January 2023.  
22  
23  
24

### 25 Randomization

26 After inclusion and baseline measurement, patients will be randomly allocated into one of the two  
27 groups: CI group or control group. The randomization will be computer-generated with block sizes  
28 of 4 and 6 and stratified for TFI score. A website randomization program, developed by Castor  
29 EDC [23] will be used for randomization. A study database was set up in Castor EDC to support  
30 allocation and concealment. Investigators enter information for each eligible patient and the  
31 randomization assignment is revealed once the investigators validate the inclusion of the patient.  
32 The block design is unavailable to those who assign participants until the moment of assignment..  
33 Blinding is not possible during this study since both patients and caregivers will be able to see  
34 from outside whether patients have a CI or not.  
35  
36  
37  
38  
39  
40  
41  
42

### 43 Intervention

44 Patients allocated to the intervention group will receive a CI. The CI will be implanted on the most  
45 affected tinnitus side, and if equal tinnitus in the two ears, in the ear with the worst hearing loss.  
46 Hearing aid will be allowed in the contralateral ear. The cochlear implantation will be carried out  
47 under general anesthesia after consent of the anesthesiologist and after determination of general  
48 health status. The standard surgical procedures for cochlear implantation will be followed. A retro-  
49 auricular incision will be made to expose the mastoid. The electrode will be inserted via a posterior  
50 tympanotomy and round window implantation by soft-surgery techniques. Intraoperatively, normal  
51 functioning of the device will be checked by measurement of impedance and neural response  
52  
53  
54  
55  
56  
57  
58  
59  
60

1  
2  
3 telemetry. Electrocochleography will also be recorded intraoperatively using Cochlear™ Research  
4 Platform (v1.1). The cochlear implant used for the study consists of a Nucleus 7 sound processor  
5 and a CI622 implant with a slim straight electrode from Cochlear (or similar). Serial numbers of  
6 the CIs will be registered in the operating room (OR) report by the surgeon (standard clinical care  
7 for cochlear implantation) and in the master study file (MSF) (product accountability). A post-  
8 operative Cone Beam CT of the mastoid will be planned to detail the electrode location within the  
9 cochlea.  
10  
11  
12  
13

14 One week after surgery patients from the intervention group will be checked at the  
15 outpatient department (OPD) of the ENT to check for wound healing. The rehabilitation phase will  
16 start 4 weeks after surgery with a visit of the patient to the department of Audiology to custom fit  
17 the processor software and then (bi)weekly till week eleven after surgery to fine-tune the  
18 programming of the implant and improve speech perception. The CI fitting will not differ from the  
19 standard of care and will be optimized for every patient.  
20  
21  
22

23 In the follow-up phase, the patients with CI will return to the UMC Utrecht 3 and 6 months after  
24 implantation to assess study outcome by the research team. The patients of the control group will  
25 come to the UMC Utrecht 3 and 6 months after randomization to assess the same study outcome.  
26 A questionnaire will have to be filled in at home by the patients before every follow-up session at  
27 3 and 6 months, as well as 2 weeks after surgery for the intervention group.  
28  
29  
30

31 Participants are not allowed to start another tinnitus treatment during the study.  
32  
33  
34

### 35 **Sample size**

36 To detect a clinically relevant difference of 1 grade (15 points) change measured with the TFI [24],  
37 in tinnitus burden at 6 months after cochlear implantation compared to the control group, with a  
38 power of 90% and alpha of 0.05, 23 patients are needed in both arms of the study. An acceptable  
39 standard deviation was set at 15, based on the results of a previous pilot study assessing CI for  
40 tinnitus patients [20]. We will include 25 patients per arm, a 10% margin, to include for possible  
41 lost to follow up. Thereby, we expect patients to have a mean TFI at baseline of 50 points on TFI  
42 (Grade 3) and a TFI decrease of 15 points at 6 months after intervention with a mean endpoint of  
43 35 points on TFI (Grade 2).  
44  
45  
46  
47  
48  
49  
50  
51  
52  
53  
54  
55  
56  
57  
58  
59  
60

## Outcomes

The following outcomes will be assessed at the baseline visit and follow up visits at 3 and 6 months after randomization (Table 1). All measurements will be performed by the research team following the same protocol procedures.

|                         | Baseline | CI GROUP |             |             |             | CONTROL GROUP |          |
|-------------------------|----------|----------|-------------|-------------|-------------|---------------|----------|
|                         | Rx       | CI       | 2 w post CI | 3 m post CI | 6 m post CI | Rx + 3 m      | Rx + 6 m |
| CI (surgery)            |          | X        |             |             |             |               |          |
| CT scan                 | X        | X        |             |             |             |               |          |
| Electro-cochleography   |          | X        |             | X           | X           |               |          |
| Hearing level           |          |          |             | X           | X           | X             | X        |
| Speech perception       | X        |          |             | X           | X           | X             | X        |
| Tinnitus pitch match    | X        |          |             | X           | X           | X             | X        |
| Tinnitus loudness match | X        |          |             | X           | X           | X             | X        |
| TFI*                    | X        |          |             | X           | X           | X             | X        |
| VAS Tinnitus *          | X        |          | X           | X           | X           | X             | X        |
| SSQ*                    | X        |          |             | X           | X           | X             | X        |
| EQ5D*                   | X        |          |             | X           | X           | X             | X        |
| HADS*                   | X        |          |             | X           | X           | X             | X        |
| BDI*                    |          |          |             |             | X           |               | X        |
| GBI*                    |          |          |             |             | X           |               |          |
| CGI*                    |          |          |             | X           | X           |               |          |
| ESIT-SQ*                | X        |          |             |             |             |               |          |

**Table 1.** Schedule of visits and assessments to measure study outcome per group.

CI: cochlear implantation; e.o.s: end of study; Rx: randomization; \* questionnaires (Q) will be filled in at home;

### Primary outcome measure

Our primary outcome is tinnitus burden as measured with the validated Tinnitus Functional Index (TFI). The Tinnitus Functional Index (TFI) is a 25 items containing questionnaire with statements/questions about tinnitus burden [24,25]. The index is divided in 8 subscale items: intrusive, sense of control, cognitive, sleep, auditory, relaxation and quality of life. Possible answers are ranging between 0 and 10, resulting in a maximum score of 100, representing a maximum burden of tinnitus. This total score is then categorized into five different grades, indicating low to high burden.

### Secondary outcome measures

#### Audiological tests

Five audiological measurements are included in the study and are performed by an audiologist according to the ISO 16832:2006 [26].

#### Pure tone audiometry

The first evaluation is a pure tone audiometry (PTA) at 0.25, 0.5, 1, 1.5, 2, 4 kHz. This standard measurement evaluates the audible threshold of the patient by having patients indicating audibility for frequency specific pure tone stimuli at different loudness level. The evaluation results in an audiogram which provides information about the hearing level of the patients.

#### Speech recognition test in quiet and noise

The second evaluation is a speech recognition test in quiet and noise. For the patients receiving a cochlear implant, post-intervention assessments will be applied with the CI. The participant is listening at digits, Dutch words and sentences in a sound-treated booth. The loudness of the speech will change during the test in steps of 2 dBs, but the noise signal will be presented at a constant level of 65dB SPL. The patient is asked to repeat back the words. The patient will perform the same test in two different conditions: with or without noise. This test results in a Speech Reception Threshold (SRT) obtained by averaging the signal-to-noise ratio over the list of words presented in order to obtain a 50% correct score. The outcome will permit to set up a rehabilitation program with a speech therapist for the intervention group.

#### Electrocochleography

1  
2  
3 Electrocochleography (ECoChG) is a technique to record electrical potentials generated in the  
4 inner ear and auditory nerve in response to acoustic stimulation. ECoChG measurement will be  
5 performed intra-operatively and at 3 and 6 months after cochlear implantation. The measure will  
6 be followed by conventional audiological examination. During the measurement postoperatively,  
7 the patient will be asked to sit comfortably on a chair and not move. The operator will install the  
8 earplug in the patient's ear and connect it to an audio cable attached to a sound processor. The  
9 sound processor will generate acoustic stimulation through the audio cable and the electrical  
10 responses will be recorded in real time via the Cochlear™ Research Platform (v1.1, Cochlear Ltd).  
11 The ECoChG provides a measure of the cochlear function.  
12  
13  
14  
15  
16  
17  
18

### 19 Pitch match experiment

20 Pitch match of tinnitus is performed to find the pitch corresponding to the tinnitus pitch of the  
21 patient. An acoustic pitch matching and an electric pitch matching will be performed in a sound-  
22 treated booth. The acoustic pitch matching will provide information about the frequency of the  
23 tinnitus perceived whereas the electric pitch matching will provide information about the pitch  
24 matched electrode. The patient will be asked to concentrate on the predominant pitch of their  
25 tinnitus. Two tones will be presented at the same intensity level previously matched with tinnitus.  
26 The patient will indicate which option, the first or the second, sounds the closest in pitch by  
27 manipulating the response switch forward and backward. The difference between the first and the  
28 second will become smaller and smaller, until there is one frequency that matches best. Each  
29 stimulation will be performed twice (apical-to-basal and basal-to-apical to prevent octave-  
30 confusion). The pitch matched will be identified as the pitch resulting of the two runs. If the result  
31 of the two runs is not the same, the procedure will be repeated until finding a consistent result at  
32 least two times [27].  
33  
34  
35  
36  
37  
38  
39  
40  
41  
42

### 43 Loudness match experiment

44 Loudness match of tinnitus is performed to find the loudness corresponding to the tinnitus  
45 acoustically and electrically [28]. The experiment uses the tinnitus pitch matched. The pure tones  
46 are initially presented at 6 dB above threshold. The patient is instructed to adjust the loudness of  
47 the comparison tones to match that of their tinnitus. The adjustment of the intensity is made in a  
48 range of 5dB for rough determination and then 1 dB steps until a satisfactory loudness match in  
49 obtained.  
50  
51  
52  
53  
54

### 55 CI usage

1  
2  
3 The history of several user characteristics will be logged from the processor. This provides the  
4 following outcome parameters:  
5

- 6       ▪ Time on air, providing the time the device was used in speech environment or the  
7       device was off
- 8       ▪ Scenes, providing the time spending in different environments: quiet, speech,  
9       noise, speech in noise, music and wind
- 10       ▪ Level of the environmental sound in dBA
- 11       ▪ Program usage, providing a daily average on program usage
- 12
- 13
- 14
- 15
- 16
- 17

## 18 Questionnaires

19 Questionnaires will be sent by e-mail to the study participants through the data management  
20 program Castor EDC [23]. If participants do not want to perform online questionnaires, they will  
21 receive paper versions of the questionnaires by postal services. All questionnaires will be in the  
22 Dutch language.  
23  
24  
25  
26

### 27 Tinnitus questionnaire

- 28       • The Visual Analogue Scale (VAS) *Tinnitus* has 2 items. The patient answers two questions  
29       about tinnitus severity and intrusiveness using a visual analogue scale that ranges from 0  
30       (not at all) to 10 (extremely).  
31  
32  
33

### 34 Tinnitus history

- 35       • The *ESIT Screening Questionnaire* (ESIT-SQ) [29] consists of 39 items relevant for  
36       tinnitus profiling including 17 general and 22 tinnitus-specific questions. Every question  
37       present multiple choice. The test is used a baseline questionnaire and takes  
38       approximately 10 minutes to fill in.  
39  
40  
41  
42  
43

### 44 Patient reported benefits

- 45       • The *Clinical Global Impression (CGI)* consists of a 1-item observer-rated scale that  
46       measures global improvement or change (CGIC) [30]. The question is scored on a scale  
47       from 1 to 7, 1 meaning “Very much improved” to 7 meaning “Very much worse”.  
48
- 49       • The *Glasgow Benefit Inventory (GBI)* is a validated questionnaire reporting change in  
50       health-related quality of life post-intervention [31]. It consists of 18 questions scored on a  
51       5-points Likert scale where 1 indicates “much worse” and 5 is for “much better”. The  
52  
53  
54  
55  
56  
57  
58  
59  
60

questionnaire presents three different items: general subscale, social support and physical health.

### Quality-of-life (QoL) questionnaires

- The *EQ5D* is a standardized measure of generic health status. It contains only 5 questions. Each question deals with a specific domain: mobility, self-care, usual activities, pain/discomfort and anxiety/depression [32]. The patient must choose between different sentences which corresponds to his/her health condition. The last question is a self-report of the overall health status using a visual analogue scaling from 0 (the worst health you can imagine) to 100 (the best health you can imagine).
- The *Speech, Spatial and Qualities Hearing Scale (SSQ)* measures hearing related quality of life and consists of three scales that assess different domains of hearing: 1) the speech hearing subscale consists of 15 questions that assess the ability to separate speech from competing noise in a wide range of listening contexts, 2) the spatial hearing subscale consists of 17 questions that assess the ability to locate sound sources and their direction of movement, 3) the quality of hearing subscale consists of 19 questions that assess naturalness and clarity of sound sources [33]. Possible answers are scored using a visual analogue scale ranging from 0 (not at all) to 10 (excellent).

### Comorbid symptom scores

- The *Beck Depression Inventory (BDI)* is a twenty-one items questionnaire used as an indicator of the severity of depression [34]. Each question is scored on four points ranged between 0 (for example 'I do not feel sad') and 3 ('I am so sad') with a maximum of total score of 63.
- The *Hospital Anxiety and Depression Scale (HADS)* is a fourteen-item screening tool for anxiety and depression symptoms in non-psychiatric clinical populations [35,36]. Each sentence is scored between 0 and 3 where 0 confirms the sentence and 3 disagrees with it.

### **Statistical analysis**

Baseline characteristics per group will be described as means or medians, depending on the normality of the data, and standard deviations. Between-group mean differences will be calculated with 95% confidence intervals. A p-value <0.05 is considered statistically significant.



1  
2  
3 The primary outcome will be the difference in TFI score between the intervention at 6  
4 months after cochlear implantation and the control group after six months of no intervention, a  
5 continuous variable. Differences between the control and intervention group will be calculated  
6 using the unpaired t-test and the Mann-Whitney u test. The secondary outcome measures will be  
7 the performances on the auditory tests and the questionnaires. Differences between groups will  
8 be calculated using the unpaired t-test and the Mann-Whitney u test. Within-subject comparisons  
9 will entail differences of mean values. These will be analyzed using paired t-tests for continuous  
10 measures.  
11  
12  
13  
14  
15

16 Interim analyses on the safety data will be performed and reviewed by an external data  
17 safety monitoring board (DSMB). An interim analysis will be done every six months starting after  
18 the 5 first patients reached 6 months of follow-up. A statistician will perform non-parametric test  
19 on the aided speech perception of the implanted ear only, performed 6 months post-implantation  
20 to monitor functional hearing performance. The DSMB will advise on stopping the study if there is  
21 a risk for the patient's safety based on tinnitus worsening and deterioration of functional hearing.  
22  
23  
24  
25

26 Potential missing data will be handled using multiple imputation. Complete cases analyses will  
27 be done as a sensitivity analysis. All analyses will be performed on an intention-to-treat basis.  
28  
29  
30  
31

## 32 **Ethics and dissemination**

### 33 **Protocol version**

34 The study will be conducted according to the principles of the Declaration of Helsinki (version  
35 2013, Fortaleza) and in accordance with the Medical Research Involving Human Subjects Act  
36 (WMO). The research protocol was approved by the Institutional Review Board (IRB) of the UMC  
37 Utrecht (NL70319.041.19) and the Dutch competent authorities.  
38  
39  
40  
41  
42

### 43 **Protocol amendment**

44 All amendments will be notified to the local Medical Research Ethics Committee (MREC). The  
45 data from this study will be used for publication in peer-reviewed international journals, preferably  
46 open-access. To diminish possible chance on publication bias, the study will be reported using  
47 the CONSORT guidelines [37].  
48  
49  
50  
51

### 52 **Confidentiality**

53 All data will be treated confidentially. The data will be encrypted by using an unique patient  
54 identification number. The analysis will be performed with these coded patient data. The key code  
55  
56  
57  
58  
59  
60

1  
2  
3 will be safeguarded by the investigators. The paper data files and informed consents will be stored  
4 in a locked cabin in a locked room. The data will be stored on the investigator's computer as well,  
5 which is secured by a password and situated in a locked room. The handling of personal data will  
6 comply with the EU General Data Protection Regulation and the Dutch Act on Implementation of  
7 the General Data Protection Regulation, the Uitvoeringswet AVG, UAVG. The final trial dataset  
8 will be safeguarded and available to the principal investigator and approved members of the  
9 research team.  
10  
11  
12  
13  
14

### 15 Data monitoring and auditing

16  
17 The investigator will submit a summary of the progress of the trial to the accredited MREC once  
18 a year. Information will be provided on the date of inclusion of the first subject, numbers of subjects  
19 included and numbers of subjects that have completed the trial, serious adverse events/serious  
20 adverse reactions, other problems, and amendments. Trial quality will be monitored independently  
21 by the Julius Clinical Centre (UMC Utrecht, the Netherlands) according to regulations by the UMC  
22 Utrecht and the Dutch government. The local monitor will check 50% of signed ICs, inclusion and  
23 exclusion criteria, source data and serious adverse events (SAE). Due to the high-risk nature of  
24 the study, an external data safety monitoring board (DSMB) will be in place to perform ongoing  
25 safety surveillance. An interim analysis will be performed by the statistician of the research group  
26 and will be analyzed by the DSMB every 6 months after the 5<sup>th</sup> first inclusions.  
27  
28  
29  
30  
31  
32  
33

### 34 Adverse events

35  
36 Besides the normal risks associated with surgery and general anaesthesia, adverse events  
37 related to cochlear implantation will be monitored by assessment and documentation of intra- and  
38 post-operative complications and device failures. Deterioration of the hearing < 30 dBs (PTA) is  
39 expected after implantation because of the cochlear trauma and should not be considered as an  
40 adverse event [38,39]. All adverse events will be followed until they have abated or until a stable  
41 situation has been reached. All cases of serious adverse events will be reported to the local IRB  
42 and the Dutch competent authorities.  
43  
44  
45  
46  
47  
48

### 49 Trial status

50  
51 The study is currently in recruitment phase.  
52  
53  
54  
55  
56  
57  
58  
59  
60

## Abbreviations

|         |                                                                                 |
|---------|---------------------------------------------------------------------------------|
| BDI     | Beck Depression Inventory                                                       |
| CBT     | Cognitive Behavioral Therapy                                                    |
| CI      | Cochlear Implant                                                                |
| CGI     | Client Global Impression                                                        |
| CONSORT | Consolidated Standard of Reporting Trials                                       |
| CT      | Computerized Tomography                                                         |
| DSMB    | Data Safety Monitoring Board                                                    |
| DTT     | Digit Triplet Test                                                              |
| ECochG  | Electrocochleography                                                            |
| ENT     | Ear, Nose and Throat                                                            |
| EQ5D    | Euro-QoL 5D                                                                     |
| ESIT-SQ | European School for Interdisciplinary Tinnitus Research Screening Questionnaire |
| EU      | European Union                                                                  |
| GBI     | Glasgow Benefit Inventory                                                       |
| HADS    | Hospital Anxiety and Depression Scale                                           |
| IC      | Informed Consent                                                                |
| IRB     | Institutional Review Board                                                      |
| MREC    | Medical Review Ethics Committee                                                 |
| MSF     | Master Study File                                                               |
| OPD     | Outpatient department                                                           |
| OR      | Operating room                                                                  |
| PTA     | Pure Tone Average                                                               |
| QoL     | Quality-of-life                                                                 |

|    |      |                                               |
|----|------|-----------------------------------------------|
| 1  |      |                                               |
| 2  |      |                                               |
| 3  | RCT  | Randomized controlled trial                   |
| 4  |      |                                               |
| 5  | SAE  | Serious Adverse Event                         |
| 6  |      |                                               |
| 7  | SNR  | Signal-to-Noise Ratio                         |
| 8  |      |                                               |
| 9  |      |                                               |
| 10 | SRT  | Speech Reception Threshold                    |
| 11 |      |                                               |
| 12 | SSD  | Single Sided Deafness                         |
| 13 |      |                                               |
| 14 | SSQ  | Speech, Spatial and Qualities Hearing Scale   |
| 15 |      |                                               |
| 16 | TFI  | Tinnitus Functional Index                     |
| 17 |      |                                               |
| 18 |      |                                               |
| 19 | UMCU | University Medical Center                     |
| 20 |      |                                               |
| 21 | VAS  | Visual analogue scale                         |
| 22 |      |                                               |
| 23 | WMO  | Medical Research Involving Human Subjects Act |
| 24 |      |                                               |
| 25 |      |                                               |
| 26 | 2AFC | Two-Alternative Forced-Choice                 |
| 27 |      |                                               |
| 28 |      |                                               |
| 29 |      |                                               |

### Authors' contributors

All authors (KKSA, ALS, IS, KSR, RJS and BvD) developed the protocol. IS provided statistical expertise in clinical trial design. KKSA drafted the manuscript. All other authors revised the manuscript. All authors read and approved the final version.

### Funding

Part of cost involved of this study is funded by Cochlear Ltd. as a non-restrictive research grant (IIR1975). Cochlear Ltd. did not and will – by a research contract – not have influence on the data collection, analysis, data interpretation and publication.

### Competing interests

KKSA received funding from the European Union's Horizon 2020 research and innovation program under the Marie Skłodowska-Curie grant (agreement number 764604). KSSA and BvD are employed at Cochlear Technology Centre, Mechelen, Belgium. No further conflict of interest is reported by the authors.

## Ethical approval

This research protocol was approved by the Institutional Review Board (IRB) of the UMC Utrecht (NL70319.041.19, V5, January 2021).

**Word count:** 3926 words

## Figure legends

**Figure 1:** Study flowchart.

CI: cochlear implant group; Control: control group

## References

1. van den Berge MJC, Free RH, Arnold R, de Kleine E, Hofman R, van Dijk JMC, et al. Cluster analysis to identify possible subgroups in tinnitus patients. *Front Neurol*. 2017;8(APR):1–7.
2. Moller AR, Salvi R, De Ridder D, Kleinjung T, Vanneste S. Pathology of Tinnitus and Hyperacusis-Clinical Implications. *Biomed Res Int* [Internet]. 2015;2015:608437. Available from: <https://doi.org/10.1155/2015/608437>
3. Møller AR. Epidemiology of Tinnitus in Adults BT - Textbook of Tinnitus. In: Møller AR, Langguth B, De Ridder D, Kleinjung T, editors. New York, NY: Springer New York; 2011. p. 29–37. Available from: [https://doi.org/10.1007/978-1-60761-145-5\\_5](https://doi.org/10.1007/978-1-60761-145-5_5)
4. Davis AE. The epidemiology of tinnitus. *Handb Tinnitus* (R Tyler,ed). 2000;Singluar:1–23.
5. Hoare DJ, Kowalkowski VL, Kang S, Hall DA. Systematic review and meta-analyses of randomized controlled trials examining tinnitus management. *Laryngoscope*. 2011 Jul;121(7):1555–64.
6. Mertens G, De Bodt M, Van de Heyning P. Cochlear implantation as a long-term treatment for ipsilateral incapacitating tinnitus in subjects with unilateral hearing loss up to 10 years. *Hear Res* [Internet]. 2016;331:1–6. Available from: <http://dx.doi.org/10.1016/j.heares.2015.09.016>
7. Dobie RA. A Review of Randomized Clinical Trials in Tinnitus. *Laryngoscope* [Internet]. 1999 Aug 1;109(8):1202–11. Available from: <https://doi.org/10.1097/00005537-199908000-00004>
8. Hoare DJ, Edmondson-Jones M, Sereda M, Akeroyd MA, Hall D. Amplification with

- 1  
2  
3 hearing aids for patients with tinnitus and co-existing hearing loss. Cochrane Database of  
4 Systematic Reviews. 2014.  
5  
6 9. Martinez-Devesa P, Perera R, Theodoulou M, Waddell A. Cognitive behavioural therapy  
7 for tinnitus. Cochrane Database Syst Rev. 2010;  
8  
9 10. Cima RFF, Mazurek B, Haider H, Kikidis D, Lapira A, Noreña A, et al. A multidisciplinary  
10 European guideline for tinnitus: diagnostics, assessment, and treatment. HNO.  
11 2019;67(March):10–42.  
12  
13 11. Fuller T, Cima R, Langguth B, Mazurek B, Waddell A, Hoare DJ, et al. Cognitive  
14 behavioural therapy for tinnitus. Cochrane Database Syst Rev. 2017;2017(4).  
15  
16 12. Sereda M, Xia J, El Refaie A, Hall DA, Hoare DJ. Sound therapy (using amplification  
17 devices and/or sound generators) for tinnitus. Cochrane Database of Systematic  
18 Reviews. 2018.  
19  
20 13. Hobson J, Chisholm E, El Refaie A. Sound therapy (masking) in the management of  
21 tinnitus in adults. Cochrane Database Syst Rev. 2012;  
22  
23 14. Ramakers GGJ, Van Zon A, Stegeman I, Grolman W. The effect of cochlear implantation  
24 on tinnitus in patients with bilateral hearing loss: A systematic review. Laryngoscope.  
25 2015;125(11):2584–92.  
26  
27 15. Ramos Macías A, Falcón-González JC, Manrique Rodríguez M, Morera Pérez C, García-  
28 Ibáñez L, Cenjor Español C, et al. One-Year Results for Patients with Unilateral Hearing  
29 Loss and Accompanying Severe Tinnitus and Hyperacusis Treated with a Cochlear  
30 Implant. *Audiol Neurotol*. 2018;23(1):8–19.  
31  
32 16. Van De Heyning P, Vermeire K, Diebl M, Nopp P, Anderson I, De Ridder D. Incapacitating  
33 unilateral tinnitus in single-sided deafness treated by cochlear implantation. *Ann Otol*  
34 *Rhinol Laryngol*. 2008;117(9):645–52.  
35  
36 17. Poncet-Wallet AC, Mamelle AE, Godey B, Truy E, Guevara N, Ardoint M, et al.  
37 Prospective Multicentric Follow-up Study of Cochlear Implantation in Adults With Single-  
38 Sided Deafness : Tinnitus and Audiological Outcomes. 2019;0.  
39  
40 18. Kleine Punte A, De Ridder D, Van De Heyning P. On the necessity of full length electrical  
41 cochlear stimulation to suppress severe tinnitus in single-sided deafness. *Hear Res*  
42 [Internet]. 2013;295:24–9. Available from: <http://dx.doi.org/10.1016/j.heares.2012.08.003>  
43  
44 19. Ahmed M., Khater A. Tinnitus suppression after cochlear implantation in patients with  
45 single-sided deafness. *Egypt J Otolaryngol*. 2017;33(1):61.  
46  
47 20. Arts RAGJ, George ELJ, Janssen M, Griessner A, Zierhofer C, Stokroos RJ. Tinnitus  
48 Suppression by Intracochlear Electrical Stimulation in Single Sided Deafness – A  
49  
50  
51  
52  
53  
54  
55  
56  
57  
58  
59  
60

- 1  
2  
3 Prospective Clinical Trial: Follow-Up. PLoS One [Internet]. 2016 Apr 25;11(4):e0153131.  
4 Available from: <https://doi.org/10.1371/journal.pone.0153131>  
5
- 6 21. Sampaio ALL, Araújo MFS, Oliveira CACP. New Criteria of Indication and Selection of  
7 Patients to Cochlear Implant. *Int J Otolaryngol*. 2011;2011:1–13.  
8
- 9 22. Chan AW, Tetzlaff JM, Gøtzsche PC, Altman DG, Mann H, Berlin JA, et al. SPIRIT 2013  
10 explanation and elaboration: guidance for protocols of clinical trials. *BMJ*. 2013;  
11
- 12 23. BV C. Castor electronic data capture. Amsterdam, The Netherlands. 2018;  
13
- 14 24. Meikle MB, Henry JA, Griest SE, Stewart BJ, Abrams HB, McArdle R, et al. The tinnitus  
15 functional index: Development of a new clinical measure for chronic, intrusive tinnitus. *Ear*  
16 *Hear*. 2012;  
17
- 18 25. Rabau S, Wouters K, Van de Heyning P. Validation and translation of the Dutch tinnitus  
19 functional index. *B-ENT [Internet]*. 2014;10(4):251–8. Available from:  
20 [http://www.embase.com/search/results?subaction=viewrecord&from=export&id=L603263](http://www.embase.com/search/results?subaction=viewrecord&from=export&id=L603263036)  
21 [036](http://www.embase.com/search/results?subaction=viewrecord&from=export&id=L603263036)  
22  
23  
24
- 25 26. Valente D. INTERNATIONAL STANDARD Acoustics — Loudness scaling by means.  
26 2006;2006.  
27
- 28 27. Arts RAGJ, George ELJ, Chenault MN, Stokroos RJ. Optimizing intracochlear electrical  
29 stimulation to suppress tinnitus. *Ear Hear*. 2015 Jan;36(1):125–35.  
30
- 31 28. Theelen-Van Den Hoek FL, Boymans M, Stainsby T, Dreschler WA. Reliability of  
32 categorical loudness scaling in the electrical domain. *Int J Audiol*. 2014;53(6):409–17.  
33
- 34 29. Genitsaridi E, Partyka M, Gallus S, Lopez-Escamez JA, Schecklmann M, Mielczarek M, et  
35 al. Standardised profiling for tinnitus research: The European School for Interdisciplinary  
36 Tinnitus Research Screening Questionnaire (ESIT-SQ). *Hear Res [Internet]*.  
37 2019;377:353–9. Available from:  
38 <http://www.sciencedirect.com/science/article/pii/S0378595518304684>  
39  
40  
41  
42
- 43 30. Guy W. CGI Clinical Global Impressions. ECDEU Assess Man. 1976;  
44
- 45 31. Hendry J, Chin A, Swan IRC, Akeroyd MA, Browning GG. The Glasgow Benefit Inventory:  
46 A systematic review of the use and value of an otorhinolaryngological generic patient-  
47 recorded outcome measure. *Clin Otolaryngol*. 2016;41(3):259–75.  
48
- 49 32. Health Policy. EuroQol - a new facility for the measurement of health-related quality of life.  
50 1990;  
51
- 52 33. Gatehouse S, Noble I. The Speech, Spatial and Qualities of Hearing Scale (SSQ). *Int J*  
53 *Audiol*. 2004;  
54
- 55 34. Beck AT, Steer RA, Ball R, Ranieri WF. Comparison of Beck depression inventories -IA  
56  
57  
58  
59  
60

- 1  
2  
3 and -II in psychiatric outpatients. *J Pers Assess.* 1996;
- 4 35. Bjelland I, Dahl AA, Haug TT, Neckelmann D. The validity of the Hospital Anxiety and  
5 Depression Scale. *J Psychosom Res.* 2002;52(2):69–77.
- 6  
7 36. Zigmond AS, Snaith RP. The Hospital Anxiety and Depression Scale. *Acta Psychiatr*  
8 *Scand.* 1983;
- 9  
10 37. Schulz KF, Altman DC, Moher D. CONSORT 2010 Statement: Updated guidelines for  
11 reporting parallel group randomised trials. *Ital J Public Health.* 2010;
- 12  
13 38. Ramos-Macías A, Borkoski-Barreiro SA, Falcón-González JC, Ramos-De Miguel A.  
14 Hearing Preservation with the Slim Modiolar Electrode Nucleus CI532® Cochlear Implant:  
15 A Preliminary Experience. *Audiol Neurotol.* 2018;
- 16  
17 39. Jurawitz MC, Büchner A, Harpel T, Schüssler M, Majdani O, Lesinski-Schiedat A, et al.  
18 Hearing preservation outcomes with different cochlear implant electrodes: Nucleus®  
19 hybrid™-L24 and nucleus freedom™ CI422. *Audiol Neurotol.* 2014;19(5):293–309.
- 20  
21  
22  
23  
24  
25  
26  
27  
28  
29  
30  
31  
32  
33  
34  
35  
36  
37  
38  
39  
40  
41  
42  
43  
44  
45  
46  
47  
48  
49  
50  
51  
52  
53  
54  
55  
56  
57  
58  
59  
60





Figure 1. Study flowchart.

CI: cochlear implant group; Control: control group

# Reporting checklist for protocol of a clinical trial.

Based on the SPIRIT guidelines.

## Instructions to authors

Complete this checklist by entering the page numbers from your manuscript where readers will find each of the items listed below.

Your article may not currently address all the items on the checklist. Please modify your text to include the missing information. If you are certain that an item does not apply, please write "n/a" and provide a short explanation.

Upload your completed checklist as an extra file when you submit to a journal.

In your methods section, say that you used the SPIRIT reporting guidelines, and cite them as:

Chan A-W, Tetzlaff JM, Altman DG, Laupacis A, Gøtzsche PC, Krleža-Jerić K, Hróbjartsson A, Mann H, Dickersin K, Berlin J, Doré C, Parulekar W, Summerskill W, Groves T, Schulz K, Sox H, Rockhold FW, Rennie D, Moher D. SPIRIT 2013 Statement: Defining standard protocol items for clinical trials. *Ann Intern Med.* 2013;158(3):200-207

|                                   |                                                                                                                                 | Page   |
|-----------------------------------|---------------------------------------------------------------------------------------------------------------------------------|--------|
|                                   | Reporting Item                                                                                                                  | Number |
| <b>Administrative information</b> |                                                                                                                                 |        |
| Title                             | <a href="#">#1</a> Descriptive title identifying the study design, population, interventions, and, if applicable, trial acronym | 1      |

|    |                     |                     |                                                            |     |
|----|---------------------|---------------------|------------------------------------------------------------|-----|
| 1  | Trial registration  | <a href="#">#2a</a> | Trial identifier and registry name. If not yet registered, | 2   |
| 2  |                     |                     |                                                            |     |
| 3  |                     |                     |                                                            |     |
| 4  |                     |                     | name of intended registry                                  |     |
| 5  |                     |                     |                                                            |     |
| 6  | Trial registration: | <a href="#">#2b</a> | All items from the World Health Organization Trial         | n/a |
| 7  |                     |                     |                                                            |     |
| 8  | data set            |                     | Registration Data Set                                      |     |
| 9  |                     |                     |                                                            |     |
| 10 |                     |                     |                                                            |     |
| 11 | Protocol version    | <a href="#">#3</a>  | Date and version identifier                                | 18  |
| 12 |                     |                     |                                                            |     |
| 13 |                     |                     |                                                            |     |
| 14 |                     |                     |                                                            |     |
| 15 | Funding             | <a href="#">#4</a>  | Sources and types of financial, material, and other        | 17  |
| 16 |                     |                     |                                                            |     |
| 17 |                     |                     | support                                                    |     |
| 18 |                     |                     |                                                            |     |
| 19 |                     |                     |                                                            |     |
| 20 | Roles and           | <a href="#">#5a</a> | Names, affiliations, and roles of protocol contributors    | 17  |
| 21 |                     |                     |                                                            |     |
| 22 | responsibilities:   |                     |                                                            |     |
| 23 |                     |                     |                                                            |     |
| 24 | contributorship     |                     |                                                            |     |
| 25 |                     |                     |                                                            |     |
| 26 |                     |                     |                                                            |     |
| 27 |                     |                     |                                                            |     |
| 28 | Roles and           | <a href="#">#5b</a> | Name and contact information for the trial sponsor         | 1   |
| 29 |                     |                     |                                                            |     |
| 30 | responsibilities:   |                     |                                                            |     |
| 31 |                     |                     |                                                            |     |
| 32 | sponsor contact     |                     |                                                            |     |
| 33 |                     |                     |                                                            |     |
| 34 | information         |                     |                                                            |     |
| 35 |                     |                     |                                                            |     |
| 36 |                     |                     |                                                            |     |
| 37 |                     |                     |                                                            |     |
| 38 | Roles and           | <a href="#">#5c</a> | Role of study sponsor and funders, if any, in study        | n/a |
| 39 |                     |                     |                                                            |     |
| 40 | responsibilities:   |                     | design; collection, management, analysis, and              |     |
| 41 |                     |                     |                                                            |     |
| 42 | sponsor and funder  |                     | interpretation of data; writing of the report; and the     |     |
| 43 |                     |                     |                                                            |     |
| 44 |                     |                     | decision to submit the report for publication, including   |     |
| 45 |                     |                     |                                                            |     |
| 46 |                     |                     | whether they will have ultimate authority over any of      |     |
| 47 |                     |                     |                                                            |     |
| 48 |                     |                     | these activities                                           |     |
| 49 |                     |                     |                                                            |     |
| 50 |                     |                     |                                                            |     |
| 51 |                     |                     |                                                            |     |
| 52 | Roles and           | <a href="#">#5d</a> | Composition, roles, and responsibilities of the            | n/a |
| 53 |                     |                     |                                                            |     |
| 54 | responsibilities:   |                     | coordinating centre, steering committee, endpoint          |     |
| 55 |                     |                     |                                                            |     |
| 56 | committees          |                     | adjudication committee, data management team, and          |     |
| 57 |                     |                     |                                                            |     |
| 58 |                     |                     |                                                            |     |
| 59 |                     |                     |                                                            |     |
| 60 |                     |                     |                                                            |     |

1 other individuals or groups overseeing the trial, if  
 2 applicable (see Item 21a for data monitoring  
 3 committee)  
 4  
 5  
 6  
 7

## 8 Introduction

10  
 11 Background and [#6a](#) Description of research question and justification for 5  
 12 rationale undertaking the trial, including summary of relevant  
 13

14 studies (published and unpublished) examining  
 15 benefits and harms for each intervention  
 16  
 17  
 18  
 19

20  
 21 Background and [#6b](#) Explanation for choice of comparators 5  
 22 rationale: choice of  
 23 comparators  
 24  
 25  
 26  
 27

28 Objectives [#7](#) Specific objectives or hypotheses 5  
 29  
 30

31 Trial design [#8](#) Description of trial design including type of trial (eg, 5  
 32 parallel group, crossover, factorial, single group),  
 33 allocation ratio, and framework (eg, superiority,  
 34 equivalence, non-inferiority, exploratory)  
 35  
 36  
 37  
 38  
 39  
 40

## 41 Methods:

42 Participants,  
 43 interventions, and  
 44 outcomes  
 45  
 46  
 47  
 48  
 49

50  
 51 Study setting [#9](#) Description of study settings (eg, community clinic, 6  
 52 academic hospital) and list of countries where data will  
 53  
 54  
 55  
 56  
 57  
 58  
 59  
 60

|    |                      |                                                                             |      |
|----|----------------------|-----------------------------------------------------------------------------|------|
| 1  |                      | be collected. Reference to where list of study sites can                    |      |
| 2  |                      |                                                                             |      |
| 3  |                      | be obtained                                                                 |      |
| 4  |                      |                                                                             |      |
| 5  |                      |                                                                             |      |
| 6  | Eligibility criteria | <a href="#">#10</a> Inclusion and exclusion criteria for participants. If   | 7    |
| 7  |                      |                                                                             |      |
| 8  |                      | applicable, eligibility criteria for study centres and                      |      |
| 9  |                      |                                                                             |      |
| 10 |                      | individuals who will perform the interventions (eg,                         |      |
| 11 |                      |                                                                             |      |
| 12 |                      | surgeons, psychotherapists)                                                 |      |
| 13 |                      |                                                                             |      |
| 14 |                      |                                                                             |      |
| 15 |                      |                                                                             |      |
| 16 | Interventions:       | <a href="#">#11a</a> Interventions for each group with sufficient detail to | 8-9  |
| 17 |                      |                                                                             |      |
| 18 | description          | allow replication, including how and when they will be                      |      |
| 19 |                      |                                                                             |      |
| 20 |                      | administered                                                                |      |
| 21 |                      |                                                                             |      |
| 22 |                      |                                                                             |      |
| 23 | Interventions:       | <a href="#">#11b</a> Criteria for discontinuing or modifying allocated      | 8-9  |
| 24 |                      |                                                                             |      |
| 25 | modifications        | interventions for a given trial participant (eg, drug dose                  |      |
| 26 |                      |                                                                             |      |
| 27 |                      | change in response to harms, participant request, or                        |      |
| 28 |                      |                                                                             |      |
| 29 |                      | improving / worsening disease)                                              |      |
| 30 |                      |                                                                             |      |
| 31 |                      |                                                                             |      |
| 32 |                      |                                                                             |      |
| 33 | Interventions:       | <a href="#">#11c</a> Strategies to improve adherence to intervention        | n/a  |
| 34 |                      |                                                                             |      |
| 35 | adherence            | protocols, and any procedures for monitoring                                |      |
| 36 |                      |                                                                             |      |
| 37 |                      | adherence (eg, drug tablet return; laboratory tests)                        |      |
| 38 |                      |                                                                             |      |
| 39 |                      |                                                                             |      |
| 40 |                      |                                                                             |      |
| 41 | Interventions:       | <a href="#">#11d</a> Relevant concomitant care and interventions that are   | 8    |
| 42 |                      |                                                                             |      |
| 43 | concomitant care     | permitted or prohibited during the trial                                    |      |
| 44 |                      |                                                                             |      |
| 45 |                      |                                                                             |      |
| 46 | Outcomes             | <a href="#">#12</a> Primary, secondary, and other outcomes, including the   | 9-14 |
| 47 |                      |                                                                             |      |
| 48 |                      | specific measurement variable (eg, systolic blood                           |      |
| 49 |                      |                                                                             |      |
| 50 |                      | pressure), analysis metric (eg, change from baseline,                       |      |
| 51 |                      |                                                                             |      |
| 52 |                      | final value, time to event), method of aggregation (eg,                     |      |
| 53 |                      |                                                                             |      |
| 54 |                      | median, proportion), and time point for each outcome.                       |      |
| 55 |                      |                                                                             |      |
| 56 |                      |                                                                             |      |
| 57 |                      |                                                                             |      |
| 58 |                      |                                                                             |      |
| 59 |                      |                                                                             |      |
| 60 |                      |                                                                             |      |

|    |                           |                                                                             |    |
|----|---------------------------|-----------------------------------------------------------------------------|----|
| 1  |                           | Explanation of the clinical relevance of chosen efficacy                    |    |
| 2  |                           | and harm outcomes is strongly recommended                                   |    |
| 3  |                           |                                                                             |    |
| 4  |                           |                                                                             |    |
| 5  |                           |                                                                             |    |
| 6  | Participant timeline      | <a href="#">#13</a> Time schedule of enrolment, interventions (including    | 10 |
| 7  |                           | any run-ins and washouts), assessments, and visits for                      |    |
| 8  |                           | participants. A schematic diagram is highly                                 |    |
| 9  |                           | recommended (see Figure)                                                    |    |
| 10 |                           |                                                                             |    |
| 11 |                           |                                                                             |    |
| 12 |                           |                                                                             |    |
| 13 |                           |                                                                             |    |
| 14 |                           |                                                                             |    |
| 15 | Sample size               | <a href="#">#14</a> Estimated number of participants needed to achieve      | 9  |
| 16 |                           | study objectives and how it was determined, including                       |    |
| 17 |                           | clinical and statistical assumptions supporting any                         |    |
| 18 |                           | sample size calculations                                                    |    |
| 19 |                           |                                                                             |    |
| 20 |                           |                                                                             |    |
| 21 |                           |                                                                             |    |
| 22 |                           |                                                                             |    |
| 23 |                           |                                                                             |    |
| 24 |                           |                                                                             |    |
| 25 | Recruitment               | <a href="#">#15</a> Strategies for achieving adequate participant enrolment | 8  |
| 26 |                           | to reach target sample size                                                 |    |
| 27 |                           |                                                                             |    |
| 28 |                           |                                                                             |    |
| 29 |                           |                                                                             |    |
| 30 |                           |                                                                             |    |
| 31 | <b>Methods:</b>           |                                                                             |    |
| 32 |                           |                                                                             |    |
| 33 | <b>Assignment of</b>      |                                                                             |    |
| 34 |                           |                                                                             |    |
| 35 | <b>interventions (for</b> |                                                                             |    |
| 36 |                           |                                                                             |    |
| 37 | <b>controlled trials)</b> |                                                                             |    |
| 38 |                           |                                                                             |    |
| 39 |                           |                                                                             |    |
| 40 |                           |                                                                             |    |
| 41 | Allocation: sequence      | <a href="#">#16a</a> Method of generating the allocation sequence (eg,      | 8  |
| 42 | generation                | computer-generated random numbers), and list of any                         |    |
| 43 |                           | factors for stratification. To reduce predictability of a                   |    |
| 44 |                           | random sequence, details of any planned restriction                         |    |
| 45 |                           | (eg, blocking) should be provided in a separate                             |    |
| 46 |                           | document that is unavailable to those who enrol                             |    |
| 47 |                           | participants or assign interventions                                        |    |
| 48 |                           |                                                                             |    |
| 49 |                           |                                                                             |    |
| 50 |                           |                                                                             |    |
| 51 |                           |                                                                             |    |
| 52 |                           |                                                                             |    |
| 53 |                           |                                                                             |    |
| 54 |                           |                                                                             |    |
| 55 |                           |                                                                             |    |
| 56 |                           |                                                                             |    |
| 57 |                           |                                                                             |    |
| 58 |                           |                                                                             |    |
| 59 |                           |                                                                             |    |
| 60 |                           |                                                                             |    |

|    |                      |                      |                                                              |       |
|----|----------------------|----------------------|--------------------------------------------------------------|-------|
| 1  | Allocation           | <a href="#">#16b</a> | Mechanism of implementing the allocation sequence            | 8     |
| 2  |                      |                      |                                                              |       |
| 3  | concealment          |                      | (eg, central telephone; sequentially numbered, opaque,       |       |
| 4  |                      |                      |                                                              |       |
| 5  | mechanism            |                      | sealed envelopes), describing any steps to conceal the       |       |
| 6  |                      |                      |                                                              |       |
| 7  |                      |                      |                                                              |       |
| 8  |                      |                      | sequence until interventions are assigned                    |       |
| 9  |                      |                      |                                                              |       |
| 10 |                      |                      |                                                              |       |
| 11 | Allocation:          | <a href="#">#16c</a> | Who will generate the allocation sequence, who will          | 8     |
| 12 |                      |                      |                                                              |       |
| 13 | implementation       |                      | enrol participants, and who will assign participants to      |       |
| 14 |                      |                      |                                                              |       |
| 15 |                      |                      |                                                              |       |
| 16 |                      |                      | interventions                                                |       |
| 17 |                      |                      |                                                              |       |
| 18 |                      |                      |                                                              |       |
| 19 | Blinding (masking)   | <a href="#">#17a</a> | Who will be blinded after assignment to interventions        | 8     |
| 20 |                      |                      |                                                              |       |
| 21 |                      |                      | (eg, trial participants, care providers, outcome             |       |
| 22 |                      |                      |                                                              |       |
| 23 |                      |                      | assessors, data analysts), and how                           |       |
| 24 |                      |                      |                                                              |       |
| 25 |                      |                      |                                                              |       |
| 26 | Blinding (masking):  | <a href="#">#17b</a> | If blinded, circumstances under which unblinding is          | n/a   |
| 27 |                      |                      |                                                              |       |
| 28 | emergency            |                      | permissible, and procedure for revealing a participant's     |       |
| 29 |                      |                      |                                                              |       |
| 30 | unblinding           |                      | allocated intervention during the trial                      |       |
| 31 |                      |                      |                                                              |       |
| 32 |                      |                      |                                                              |       |
| 33 |                      |                      |                                                              |       |
| 34 | <b>Methods: Data</b> |                      |                                                              |       |
| 35 |                      |                      |                                                              |       |
| 36 | collection,          |                      |                                                              |       |
| 37 |                      |                      |                                                              |       |
| 38 | management, and      |                      |                                                              |       |
| 39 |                      |                      |                                                              |       |
| 40 | analysis             |                      |                                                              |       |
| 41 |                      |                      |                                                              |       |
| 42 |                      |                      |                                                              |       |
| 43 |                      |                      |                                                              |       |
| 44 | Data collection plan | <a href="#">#18a</a> | Plans for assessment and collection of outcome,              | 15-16 |
| 45 |                      |                      |                                                              |       |
| 46 |                      |                      | baseline, and other trial data, including any related        |       |
| 47 |                      |                      |                                                              |       |
| 48 |                      |                      | processes to promote data quality (eg, duplicate             |       |
| 49 |                      |                      |                                                              |       |
| 50 |                      |                      | measurements, training of assessors) and a                   |       |
| 51 |                      |                      |                                                              |       |
| 52 |                      |                      |                                                              |       |
| 53 |                      |                      | description of study instruments (eg, questionnaires,        |       |
| 54 |                      |                      |                                                              |       |
| 55 |                      |                      | laboratory tests) along with their reliability and validity, |       |
| 56 |                      |                      |                                                              |       |
| 57 |                      |                      |                                                              |       |
| 58 |                      |                      |                                                              |       |
| 59 |                      |                      |                                                              |       |
| 60 |                      |                      |                                                              |       |

|    |                        |                                                                             |       |
|----|------------------------|-----------------------------------------------------------------------------|-------|
| 1  |                        | if known. Reference to where data collection forms can                      |       |
| 2  |                        |                                                                             |       |
| 3  |                        | be found, if not in the protocol                                            |       |
| 4  |                        |                                                                             |       |
| 5  |                        |                                                                             |       |
| 6  | Data collection plan:  | <a href="#">#18b</a> Plans to promote participant retention and complete    | 15    |
| 7  |                        |                                                                             |       |
| 8  | retention              | follow-up, including list of any outcome data to be                         |       |
| 9  |                        |                                                                             |       |
| 10 |                        | collected for participants who discontinue or deviate                       |       |
| 11 |                        |                                                                             |       |
| 12 |                        | from intervention protocols                                                 |       |
| 13 |                        |                                                                             |       |
| 14 |                        |                                                                             |       |
| 15 |                        |                                                                             |       |
| 16 | Data management        | <a href="#">#19</a> Plans for data entry, coding, security, and storage,    | 15-16 |
| 17 |                        |                                                                             |       |
| 18 |                        | including any related processes to promote data quality                     |       |
| 19 |                        |                                                                             |       |
| 20 |                        | (eg, double data entry; range checks for data values).                      |       |
| 21 |                        |                                                                             |       |
| 22 |                        | Reference to where details of data management                               |       |
| 23 |                        |                                                                             |       |
| 24 |                        | procedures can be found, if not in the protocol                             |       |
| 25 |                        |                                                                             |       |
| 26 |                        |                                                                             |       |
| 27 |                        |                                                                             |       |
| 28 | Statistics: outcomes   | <a href="#">#20a</a> Statistical methods for analysing primary and          | 14    |
| 29 |                        |                                                                             |       |
| 30 |                        | secondary outcomes. Reference to where other details                        |       |
| 31 |                        |                                                                             |       |
| 32 |                        | of the statistical analysis plan can be found, if not in the                |       |
| 33 |                        |                                                                             |       |
| 34 |                        | protocol                                                                    |       |
| 35 |                        |                                                                             |       |
| 36 |                        |                                                                             |       |
| 37 |                        |                                                                             |       |
| 38 | Statistics: additional | <a href="#">#20b</a> Methods for any additional analyses (eg, subgroup and  | 14    |
| 39 |                        |                                                                             |       |
| 40 | analyses               | adjusted analyses)                                                          |       |
| 41 |                        |                                                                             |       |
| 42 |                        |                                                                             |       |
| 43 | Statistics: analysis   | <a href="#">#20c</a> Definition of analysis population relating to protocol | 15    |
| 44 |                        |                                                                             |       |
| 45 | population and         | non-adherence (eg, as randomised analysis), and any                         |       |
| 46 |                        |                                                                             |       |
| 47 | missing data           | statistical methods to handle missing data (eg, multiple                    |       |
| 48 |                        |                                                                             |       |
| 49 |                        | imputation)                                                                 |       |
| 50 |                        |                                                                             |       |
| 51 |                        |                                                                             |       |
| 52 |                        |                                                                             |       |

## 53 Methods: Monitoring



|    |                      |                      |                                                          |           |
|----|----------------------|----------------------|----------------------------------------------------------|-----------|
| 1  | Data monitoring:     | <a href="#">#21a</a> | Composition of data monitoring committee (DMC);          | 15        |
| 2  |                      |                      |                                                          |           |
| 3  | formal committee     |                      | summary of its role and reporting structure; statement   |           |
| 4  |                      |                      | of whether it is independent from the sponsor and        |           |
| 5  |                      |                      | competing interests; and reference to where further      |           |
| 6  |                      |                      | details about its charter can be found, if not in the    |           |
| 7  |                      |                      | protocol. Alternatively, an explanation of why a DMC is  |           |
| 8  |                      |                      | not needed                                               |           |
| 9  |                      |                      |                                                          |           |
| 10 |                      |                      |                                                          |           |
| 11 |                      |                      |                                                          |           |
| 12 |                      |                      |                                                          |           |
| 13 |                      |                      |                                                          |           |
| 14 |                      |                      |                                                          |           |
| 15 |                      |                      |                                                          |           |
| 16 |                      |                      |                                                          |           |
| 17 |                      |                      |                                                          |           |
| 18 | Data monitoring:     | <a href="#">#21b</a> | Description of any interim analyses and stopping         | 14, 16    |
| 19 | interim analysis     |                      | guidelines, including who will have access to these      |           |
| 20 |                      |                      | interim results and make the final decision to terminate |           |
| 21 |                      |                      | the trial                                                |           |
| 22 |                      |                      |                                                          |           |
| 23 |                      |                      |                                                          |           |
| 24 |                      |                      |                                                          |           |
| 25 |                      |                      |                                                          |           |
| 26 |                      |                      |                                                          |           |
| 27 |                      |                      |                                                          |           |
| 28 | Harms                | <a href="#">#22</a>  | Plans for collecting, assessing, reporting, and          | 16        |
| 29 |                      |                      | managing solicited and spontaneously reported            |           |
| 30 |                      |                      | adverse events and other unintended effects of trial     |           |
| 31 |                      |                      | interventions or trial conduct                           |           |
| 32 |                      |                      |                                                          |           |
| 33 |                      |                      |                                                          |           |
| 34 |                      |                      |                                                          |           |
| 35 |                      |                      |                                                          |           |
| 36 |                      |                      |                                                          |           |
| 37 |                      |                      |                                                          |           |
| 38 | Auditing             | <a href="#">#23</a>  | Frequency and procedures for auditing trial conduct, if  | n/a       |
| 39 |                      |                      | any, and whether the process will be independent from    |           |
| 40 |                      |                      | investigators and the sponsor                            |           |
| 41 |                      |                      |                                                          |           |
| 42 |                      |                      |                                                          |           |
| 43 |                      |                      |                                                          |           |
| 44 |                      |                      |                                                          |           |
| 45 | <b>Ethics and</b>    |                      |                                                          |           |
| 46 | <b>dissemination</b> |                      |                                                          |           |
| 47 |                      |                      |                                                          |           |
| 48 |                      |                      |                                                          |           |
| 49 |                      |                      |                                                          |           |
| 50 |                      |                      |                                                          |           |
| 51 | Research ethics      | <a href="#">#24</a>  | Plans for seeking research ethics committee /            | 15-16, 17 |
| 52 | approval             |                      | institutional review board (REC / IRB) approval          |           |
| 53 |                      |                      |                                                          |           |
| 54 |                      |                      |                                                          |           |
| 55 |                      |                      |                                                          |           |
| 56 |                      |                      |                                                          |           |
| 57 |                      |                      |                                                          |           |
| 58 |                      |                      |                                                          |           |
| 59 |                      |                      |                                                          |           |
| 60 |                      |                      |                                                          |           |

|    |                    |                      |                                                            |       |
|----|--------------------|----------------------|------------------------------------------------------------|-------|
| 1  | Protocol           | <a href="#">#25</a>  | Plans for communicating important protocol                 | 15    |
| 2  |                    |                      |                                                            |       |
| 3  | amendments         |                      | modifications (eg, changes to eligibility criteria,        |       |
| 4  |                    |                      | outcomes, analyses) to relevant parties (eg,               |       |
| 5  |                    |                      | investigators, REC / IRBs, trial participants, trial       |       |
| 6  |                    |                      | registries, journals, regulators)                          |       |
| 7  |                    |                      |                                                            |       |
| 8  |                    |                      |                                                            |       |
| 9  |                    |                      |                                                            |       |
| 10 |                    |                      |                                                            |       |
| 11 |                    |                      |                                                            |       |
| 12 |                    |                      |                                                            |       |
| 13 | Consent or assent  | <a href="#">#26a</a> | Who will obtain informed consent or assent from            | 8     |
| 14 |                    |                      | potential trial participants or authorised surrogates, and |       |
| 15 |                    |                      | how (see Item 32)                                          |       |
| 16 |                    |                      |                                                            |       |
| 17 |                    |                      |                                                            |       |
| 18 |                    |                      |                                                            |       |
| 19 |                    |                      |                                                            |       |
| 20 |                    |                      |                                                            |       |
| 21 | Consent or assent: | <a href="#">#26b</a> | Additional consent provisions for collection and use of    | 15    |
| 22 | ancillary studies  |                      | participant data and biological specimens in ancillary     |       |
| 23 |                    |                      | studies, if applicable                                     |       |
| 24 |                    |                      |                                                            |       |
| 25 |                    |                      |                                                            |       |
| 26 |                    |                      |                                                            |       |
| 27 |                    |                      |                                                            |       |
| 28 | Confidentiality    | <a href="#">#27</a>  | How personal information about potential and enrolled      | 15    |
| 29 |                    |                      | participants will be collected, shared, and maintained in  |       |
| 30 |                    |                      | order to protect confidentiality before, during, and after |       |
| 31 |                    |                      | the trial                                                  |       |
| 32 |                    |                      |                                                            |       |
| 33 |                    |                      |                                                            |       |
| 34 |                    |                      |                                                            |       |
| 35 |                    |                      |                                                            |       |
| 36 |                    |                      |                                                            |       |
| 37 |                    |                      |                                                            |       |
| 38 | Declaration of     | <a href="#">#28</a>  | Financial and other competing interests for principal      | 17    |
| 39 | interests          |                      | investigators for the overall trial and each study site    |       |
| 40 |                    |                      |                                                            |       |
| 41 |                    |                      |                                                            |       |
| 42 |                    |                      |                                                            |       |
| 43 |                    |                      |                                                            |       |
| 44 | Data access        | <a href="#">#29</a>  | Statement of who will have access to the final trial       | 15-16 |
| 45 |                    |                      | dataset, and disclosure of contractual agreements that     |       |
| 46 |                    |                      | limit such access for investigators                        |       |
| 47 |                    |                      |                                                            |       |
| 48 |                    |                      |                                                            |       |
| 49 |                    |                      |                                                            |       |
| 50 |                    |                      |                                                            |       |
| 51 | Ancillary and post | <a href="#">#30</a>  | Provisions, if any, for ancillary and post-trial care, and | n/a   |
| 52 | trial care         |                      | for compensation to those who suffer harm from trial       |       |
| 53 |                    |                      | participation                                              |       |
| 54 |                    |                      |                                                            |       |
| 55 |                    |                      |                                                            |       |
| 56 |                    |                      |                                                            |       |
| 57 |                    |                      |                                                            |       |
| 58 |                    |                      |                                                            |       |
| 59 |                    |                      |                                                            |       |
| 60 |                    |                      |                                                            |       |

|    |                                            |                                                                              |           |
|----|--------------------------------------------|------------------------------------------------------------------------------|-----------|
| 1  | Dissemination policy: <a href="#">#31a</a> | Plans for investigators and sponsor to communicate                           | 15        |
| 2  |                                            |                                                                              |           |
| 3  | trial results                              | trial results to participants, healthcare professionals,                     |           |
| 4  |                                            | the public, and other relevant groups (eg, via                               |           |
| 5  |                                            | publication, reporting in results databases, or other                        |           |
| 6  |                                            | data sharing arrangements), including any publication                        |           |
| 7  |                                            | restrictions                                                                 |           |
| 8  |                                            |                                                                              |           |
| 9  |                                            |                                                                              |           |
| 10 |                                            |                                                                              |           |
| 11 | Dissemination policy: <a href="#">#31b</a> | Authorship eligibility guidelines and any intended use                       | n/a       |
| 12 |                                            |                                                                              |           |
| 13 | authorship                                 | of professional writers                                                      |           |
| 14 |                                            |                                                                              |           |
| 15 |                                            |                                                                              |           |
| 16 | Dissemination policy: <a href="#">#31c</a> | Plans, if any, for granting public access to the full                        | n/a       |
| 17 |                                            |                                                                              |           |
| 18 | reproducible                               | protocol, participant-level dataset, and statistical code                    |           |
| 19 |                                            |                                                                              |           |
| 20 | research                                   |                                                                              |           |
| 21 |                                            |                                                                              |           |
| 22 |                                            |                                                                              |           |
| 23 |                                            |                                                                              |           |
| 24 |                                            |                                                                              |           |
| 25 |                                            |                                                                              |           |
| 26 |                                            |                                                                              |           |
| 27 |                                            |                                                                              |           |
| 28 | <b>Appendices</b>                          |                                                                              |           |
| 29 |                                            |                                                                              |           |
| 30 |                                            |                                                                              |           |
| 31 | Informed consent                           | <a href="#">#32</a> Model consent form and other related documentation       | Extra     |
| 32 |                                            |                                                                              |           |
| 33 | materials                                  | given to participants and authorised surrogates                              | documents |
| 34 |                                            |                                                                              |           |
| 35 |                                            |                                                                              |           |
| 36 |                                            |                                                                              |           |
| 37 | Biological specimens                       | <a href="#">#33</a> Plans for collection, laboratory evaluation, and storage | n/a       |
| 38 |                                            |                                                                              |           |
| 39 |                                            | of biological specimens for genetic or molecular                             |           |
| 40 |                                            | analysis in the current trial and for future use in                          |           |
| 41 |                                            | ancillary studies, if applicable                                             |           |
| 42 |                                            |                                                                              |           |
| 43 |                                            |                                                                              |           |
| 44 |                                            |                                                                              |           |
| 45 |                                            |                                                                              |           |
| 46 |                                            |                                                                              |           |

47 The SPIRIT checklist is distributed under the terms of the Creative Commons Attribution License CC-  
 48 BY-ND 3.0. This checklist was completed on 14. July 2020 using <https://www.goodreports.org/>, a tool  
 49 made by the [EQUATOR Network](#) in collaboration with [Penelope.ai](#)  
 50  
 51  
 52  
 53  
 54  
 55  
 56  
 57  
 58  
 59  
 60
